1 **Title:** The circadian clock gene circuit controls protein and phosphoprotein rhythms in  
2 *Arabidopsis thaliana*.

3

4 **Short title:** Clock gene regulation of the Arabidopsis (phospho)proteome

5

6 **Authors:**

7 Dr Johanna Krahmer<sup>1,2,5</sup>, Dr Matthew Hindle<sup>3</sup>, Dr Laura K Perby<sup>4</sup>, Prof Tom H Nielsen<sup>4</sup>, Prof

8 Karen J Halliday<sup>2</sup>, Dr Gerben van Ooijen<sup>2</sup>, Dr Thierry Le Bihan<sup>1</sup>, Prof Andrew J Millar<sup>1</sup>

9

10 **Affiliations:**

11 <sup>1</sup>SynthSys and School of Biological Sciences, CH Waddington Building, Max Born Crescent,  
12 Kings Buildings, University of Edinburgh, Edinburgh, EH9 3BF, United Kingdom

13 <sup>2</sup>Institute for Molecular Plant Science, School of Biological Sciences, Daniel Rutherford  
14 Building, Building, Max Born Crescent, Kings Buildings, University of Edinburgh,  
15 Edinburgh, EH9 3BF, United Kingdom

16 <sup>3</sup>The Roslin Institute and Royal (Dick) School of Veterinary Studies, Easter Bush, Edinburgh,  
17 EH25 9RG, United Kingdom

18 <sup>4</sup>Department of Plant and Environmental Sciences, University of Copenhagen, Section for  
19 Molecular Plant Biology, Thorvaldsensvej 40, DK-1871 Frederiksberg C, Denmark

20 <sup>5</sup>Present address: Center for Integrative Genomics, Faculty of Biology and Medicine,  
21 University of Lausanne, 1015 Lausanne, Switzerland

22 **Corresponding author information:**

23 Johanna Krahmer, email: [johanna.krahmer@unil.ch](mailto:johanna.krahmer@unil.ch)

24 Andrew J Millar, email: [Andrew.Millar@ed.ac.uk](mailto:Andrew.Millar@ed.ac.uk)

25

26 **ORCID:**

27 Johanna Krahmer: 0000-0001-7728-5110

28 Matthew Hindle: 0000-0002-6870-4069  
29 Andrew Millar: 0000-0003-1756-3654  
30 Gerben van Ooijen: 0000-0001-7967-0637

31 **Abbreviations:**

32 TTFL           Transcriptional translational feedback loop  
33 NTO            non-transcriptional oscillator  
34 F2KP           fructose-6-phosphate-2-kinase / phosphatase  
35 CCA1           Circadian clock associated 1  
36 CCA1-OX       CCA1 overexpressor  
37 CK            casein kinase  
38 SNF-1         sucrose non-fermenting  
39 SnRK          SNF-1 related kinase  
40 TOC1          timing of CAB expression 1  
41 TOC1-Ox       TOC1 overexpressor  
42 PRX           peroxiredoxin  
43 PCA           principal component analysis  
44 Col-0          Columbia 0  
45 ZT            Zeitgeber time  
46 h             hour  
47 WT            wildtype  
48 GO            gene ontology  
49 SEM          standard error of the mean  
50 BH            Benjamini - Hochberg

51

52 **Abstract**

53 24-hour, circadian rhythms control many eukaryotic mRNA levels, whereas the levels of their  
54 more stable proteins are not expected to reflect the RNA rhythms, emphasizing the need to  
55 test the circadian regulation of protein abundance and modification. Here we present circadian

56 proteomic and phosphoproteomic time-series from *Arabidopsis thaliana* plants under constant  
57 light conditions, estimating that just 0.4% of quantified proteins but a much larger proportion  
58 of quantified phospho-sites were rhythmic. Approximately half of the rhythmic phospho-sites  
59 were most phosphorylated at subjective dawn, a pattern we term the ‘phospho-dawn’.  
60 Members of the SnRK/CDPK family of protein kinases are candidate regulators. A *CCA1*-  
61 over-expressing line that disables the clock gene circuit lacked most circadian protein  
62 phosphorylation. However, the few phospho-sites that fluctuated despite *CCA1*-over-  
63 expression still tended to peak in abundance close to subjective dawn, suggesting that the  
64 canonical clock mechanism is necessary for most but perhaps not all protein phosphorylation  
65 rhythms. To test the potential functional relevance of our datasets, we conducted  
66 phosphomimetic experiments using the bifunctional enzyme fructose-6-phosphate-2-kinase /  
67 phosphatase (F2KP), as an example. The rhythmic phosphorylation of diverse protein targets  
68 is controlled by the clock gene circuit, implicating post-translational mechanisms in the  
69 transmission of circadian timing information in plants.

70

## 71 **Keywords**

72 circadian clock; non-transcriptional oscillator; *Arabidopsis*; phosphoproteomics

73

## 74 **Introduction**

75 Most circadian observations in the well-characterised plant species *Arabidopsis thaliana* can  
76 be explained by a genetic network of mostly negatively interacting transcription factors (1,2).  
77 In addition to transcriptional interactions, this transcriptional-translational feedback loop  
78 (TTFL) system requires post-translational modification of transcription factor proteins (3).  
79 Phosphorylation of CCA1 by casein kinase (CK) 2 for example is necessary for the circadian  
80 clock function (4).  
81 Protein phosphorylation is involved in the circadian clock mechanism not only in plants but  
82 also in fungi, animals and cyanobacteria (3,5). While the transcription factors of TTFLs in  
83 animals, fungi and plants are not evolutionarily conserved (3), many kinases that play a role

84 in circadian timekeeping are similar across eukaryotes. For instance CK2 is also important for  
85 circadian timing in mammals (6) and fungi (7). Protein phosphorylation is also involved in the  
86 output of the circadian clock (8). However, only one study has so far addressed the question  
87 of how pervasive circadian protein phosphorylation is in higher plants (9).

88

89 In circadian biology, transcriptional studies have long dominated research efforts, leading to  
90 the well-established TTFL models (e.g. refs (1,2,10–12)). However, it has become apparent  
91 that protein abundance and post-translational modification cannot be ignored, since these do  
92 not simply follow transcript expression patterns (e.g. refs. (13–15)). There is even evidence  
93 that circadian oscillations can be driven by non-transcriptional oscillators (NTOs) that are  
94 independent of rhythmic transcription. The cyanobacterial circadian clock is based on  
95 rhythmic autophosphorylation of the KaiC protein together with the KaiA and KaiB proteins  
96 and this mechanism does not even require a living cell to create oscillations (16). Evidence  
97 for NTOs also exists in eukaryotes; the protein peroxiredoxin (PRX) is rhythmically over-  
98 oxidized in the absence of transcription in algae and human red blood cells (17,18). Circadian  
99 rhythms of PRX over-oxidation were also observed in organisms that have impaired circadian  
100 oscillators, in mutants of the fungus *Neurospora crassa* and in transgenic *Arabidopsis* plants  
101 (19). The circadian PRX over-oxidation rhythm even exists in cyanobacteria and archaea  
102 (19). In addition, circadian magnesium and potassium ion transport has been observed across  
103 eukaryotes and can occur in transcriptionally inactive *Ostreococcus tauri* and human red  
104 blood cells (20,21). Therefore, at least some eukaryotes possess NTOs that appear to be  
105 evolutionarily ancient and conserved (3).

106

107 With mass spectrometer technology becoming more and more advanced, several circadian  
108 proteomics studies have been conducted in different species, such as proteomics analyses of  
109 protein abundance time courses (15,22–25), proteomics specifically at the day / night  
110 transition (25,26) or circadian phosphoproteomics (9,24).

111 In this study, we used mass spectrometry based proteomics and phosphoproteomics on

112 circadian time courses to address the following questions: (1) How pervasive are rhythms in  
113 protein abundance and phosphorylation as a clock output in a normally functioning circadian  
114 clock system, and what are the characteristics of such rhythms? and (2) can protein abundance  
115 or phosphorylation be rhythmic in a plant with a disabled transcriptional oscillator? To  
116 investigate (1), we used a time course of WT plants, and for addressing (2), we generated time  
117 courses from plants overexpressing the *CIRCADIAN CLOCK-ASSOCIATED 1* gene (CCA1-  
118 OX), which have an impaired TTFL. We generated global proteomics and phosphoproteomics  
119 data in parallel from the same protein extracts. Our analysis revealed that the transcriptional  
120 oscillator is required for most rhythmic protein phosphorylation, and that most rhythmic  
121 phosphopeptides peak at subjective dawn. We also found this ‘phospho-dawn’ trend among  
122 the time courses of fluctuating phosphopeptides in the CCA1-OX. Finally, we selected a  
123 phosphosite of the bifunctional enzyme fructose-6-phosphate-2-kinase / fructose-2,6-  
124 bisphosphatase (F2KP) to illustrate how our data can be used to study the mechanisms of  
125 clock output pathways that connect to central carbon metabolism.

126

## 127 **Experimental Procedures**

128

### 129 *Plant material*

130 *Arabidopsis thaliana* WT (Col-0 accession) and a *CCA1* over-expressing plants (‘CCA1-OX’,  
131 (27)) were used in this study. Seeds were germinated and grown on plates (2.15g/l Murashige  
132 & Skoog medium Basal Salt Mixture (Duchefa Biochemie), pH 5.8 (adjusted with KOH) and  
133 12g/l agar (Sigma)) at  $85\mu\text{mol m}^{-2} \text{s}^{-1}$  white fluorescent lights at 21°C in Percival incubators  
134 for 11 days in 12h light, 12h dark cycles. Seedlings were transferred to soil and grown for 11  
135 more days at a light intensity of  $110\mu\text{mol m}^{-2} \text{s}^{-1}$  in the same light-dark cycle.

136

### 137 *Experimental Design and Statistical Rationale*

138 After plants had grown for a total of 22 days, from ZT 0 of day 23 lights remained switched  
139 on continuously and collection of plant material started at ZT 12 (dataset I) or ZT 24 (dataset

140 II). In dataset I, six time points at 4h intervals were taken with five replicates for each time  
141 point, harvesting eight rosettes for the WT and 12 rosettes for the CCA1-OX. In dataset II,  
142 also at 4h intervals, at least six replicates of eight rosettes each were taken for the WT, five  
143 (16 rosettes each) of the CCA1-OX. In dataset I, the time course was sampled from ZT12 to  
144 ZT32, in dataset II from ZT24 to 48 (CCA1-OX) or ZT24 to ZT52 (WT).  
145 Statistical analysis of time courses required assessment of not only changes but also  
146 rhythmicity. We therefore used both analysis of variance (ANOVA) and JTK\_CYCLE as  
147 statistical tools (see below for details).

148

#### 149 *Sample preparation*

150 Rosettes without roots were harvested by flash-freezing in liquid nitrogen. Protein extraction  
151 and precipitation was carried out according to method 'IGEPAL-TCA' described by (28).  
152 Briefly, protein was extracted and precipitated with TCA and phase separation, then washed  
153 with methanol and acetone. 500µg re-suspended protein was digested using a standard in-  
154 solution protocol and peptides were desalted. Before drying, eluted peptides were separated  
155 into two parts: 490µg of the digest was used for phosphopeptide enrichment, 10µg was saved  
156 for global protein analysis. Phosphopeptides were enriched using the Titansphere™ spin tip  
157 kit (GL Sciences Inc.) and desalted on BondElut Omix tips (Agilent) according to the  
158 manufacturers' instructions.

159

#### 160 *Mass spectrometry, peptide merging and Progenesis analysis*

161 LC-MS/MS measurement and subsequent analysis by the Progenesis software (version  
162 4.1.4924.40586) was carried out as previously described (28): Dried peptides were dissolved  
163 in 12 µl (phosphoproteomics) or 20µl (global proteomics) 0.05% TFA and passed through  
164 Millex-LH 0.45µm (Millipore) filters. 8 µl were run on an on-line capillary- HPLC-MSMS  
165 system consisting of a micropump (1200 binary HPLC system, Agilent, UK) coupled to a  
166 hybrid LTQ-Orbitrap XL instrument (Thermo-Fisher, UK). Reverse phase buffer used for  
167 LC-MS separation was buffer A (2.5% acetonitrile, 0.1% FA in H<sub>2</sub>O) and buffer B (10%

168 H<sub>2</sub>O, 90% acetonitrile, 0.1% formic acid, 0.025% TFA). LC peptide separation was carried  
169 out on an initial 80 min long linear gradient from 0% to 35% buffer B, then a steeper gradient  
170 up to 98% buffer B over a period of 20 min then remaining constant at 98% buffer B for 15  
171 min until a quick drop to 0% buffer B before the end of the run at 120 min.

172 The tair Arabidopsis\_1rep (version 20110103, 27416 protein entries) database was used for  
173 data-dependent detection, using the Mascot search engine (version 2.4), including all peptide  
174 sequences of rank smaller than 5. Search parameters were as follows: charges 2+, 3+ and 4+,  
175 trypsin as enzyme, allowing up to two missed cleavages, carbamidomethyl (C) as a fixed  
176 modification, Oxidation (M), Phospho (ST) and Phospho (Y), Acetyl(Protein N-term) as  
177 variable modifications, a peptide tolerance of 7 ppm, and MS/MS tolerance of 0.4 Da, peptide  
178 charges 2+, 3+, and 4+, on an ESI-trap instrument, with decoy search and an ion-cutoff of 20.  
179 In all but one cases, these parameters resulted in a false-discovery rate (FDR), of less than 5%  
180 with one exception (phosphoproteomics dataset I: 3.5%, phosphoproteomics dataset II: 3.2,  
181 global dataset I: 6.8%, global dataset II: 4.5%, calculated using the formula  $2*d/(n+d)$  (29), n  
182 and d being the number of hits in the normal and decoy databases, respectively, using an ion  
183 score cutoff of 20). Peptides were quantified by their peak area by Progenesis, and proteins  
184 were quantified by using the sum of the quantitation of all unique peptides. Where peptides  
185 matched very similar proteins, multiple accession numbers are shown in exported results from  
186 Progenesis (Supplementary Data S1, S2).

187 In order to remove duplicates of phosphopeptides due to alternative modifications other than  
188 phosphorylation or missed cleavages, we used the qpMerge software following the Progenesis  
189 analysis (30). The data are publicly available in the pep2pro database (31) at [http://fgcz-](http://fgcz-pep2pro.uzh.ch)  
190 [pep2pro.uzh.ch](http://fgcz-pep2pro.uzh.ch) (Assembly names 'ed.ac.uk Global I', 'ed.ac.uk Global II', 'ed.ac.uk Phospho  
191 I', 'ed.ac.uk Phospho II') and have been deposited to the ProteomeXchange Consortium  
192 (<http://proteomecentral.proteomexchange.org>) via the PRIDE partner repository (32) with the  
193 dataset identifier PXD009230. Exported .csv files from Progenesis with all peptide and  
194 protein quantifications can be found in the online supplementary material (Data S1 and S2).  
195

196 *General statistics and outlier removal*

197 Results of statistical analyses are summarised in Data S3. Outlier analysis, statistics and Venn  
198 diagrams were done using R version 3.2.1 (33). Zero values for the quantification were  
199 exchanged for 'NA'. For outlier analysis and parametric tests such as ANOVA, arcsinh  
200 transformed data was used to obtain a normal distribution, while untransformed data was used  
201 for plotting time courses and for the non-parametric JTK\_CYCLE analysis. For  
202 phosphoproteomics analysis all replicates in which the Pearson correlation coefficient among  
203 replicates of the same time point was lower than 0.8 were regarded as outliers (supplementary  
204 methods, Supplementary Data S4). In global dataset II, the first run replicate of each time  
205 point had to be excluded as an outlier due to an apparent drift (Supplementary Data S4). To  
206 generate heat maps, the abundance of each peptide or protein was normalized by the time  
207 course mean of the peptide or protein, followed by taking the log<sub>2</sub> to centre values around 0,  
208 and the heatmap.2 function from the pvclust R package was applied (34).

209

210 *JTK\_CYCLE analysis*

211 We used the R-based tool JTK\_CYCLE (35) to determine rhythmicity, with the following  
212 modifications: (1) we ran the JTK\_CYCLE algorithm for each phosphosite or protein  
213 separately rather than the entire list, to allow handling of missing quantification values for  
214 some replicates. Benjamini Hochberg (BH) (36) correction of p-values was carried out after  
215 application of the JTK\_CYCLE tool. (2) Since our time course durations are close to the  
216 periods of rhythms we are searching for, some identifications were assessed as rhythmic by  
217 the original JTK\_CYCLE tool that were increasing or decreasing continually over the entire  
218 time course. We excluded these from the group of rhythmic identifications ('excl.' in p-value  
219 column in Supplementary Data S5). For dataset-wide analyses we used  $p < 0.05$  as a cutoff for  
220 rhythmicity and then trusted results that agree between experiments. Similarly, for judging  
221 individual time courses we focus on those with  $p < 0.05$  in both datasets.

222

223 *Kinase prediction using GPS3.0*



224 Kinases for each site were predicted using the *Arabidopsis thaliana* specific GPS 3.0  
225 prediction tool in its species specific mode for *Arabidopsis thaliana* (37,38). For each  
226 phosphorylation site, an amino acid sequence was generated that contained 50 amino acids on  
227 either side of the phosphorylated residue using a python script. This resulted in 101 amino  
228 acid long sequences, unless the phosphosite was closer than 50 residues to the C or T  
229 terminus in which case the missing positions were filled by 'X'. The phosphopeptides used as  
230 foreground were the significantly rhythmic phosphosites (JTK\_CYCLE p-value < 0.05)  
231 peaking at a given time point, all other phosphosites identified in the same experiment were  
232 used as background. The high threshold setting was used to minimize false-positive  
233 predictions and searches were done for S and T residues. In order to reduce the complexity of  
234 the dataset, we used a simplification: where kinases from different families were predicted,  
235 only the one with the highest difference between score and cutoff was used. For foreground  
236 and background the numbers of predictions for each occurring kinase group were counted and  
237 the Fisher's Exact test was used to determine predicted kinases that were significantly  
238 enriched in the foreground group (p<0.05).

239

#### 240 *GO analysis*

241 For GO analysis, foreground and background were chosen as in the kinase prediction  
242 analysis. With these groups, GO analysis was conducted using the topGO script (39),  
243 followed by Fisher's exact test to determine enrichment of terms (supplementary data S6).

244

#### 245 *Generation of F2KP point mutations and expression constructs*

246 The F2KP coding sequence in the pDONR221 vector, lacking a stop codon, was kindly  
247 provided by Dr Sebastian Streb, ETH Zürich. The QuikChange Lightning Site-Directed  
248 Mutagenesis kit (Agilent Technologies) was used to introduce point mutations using primer  
249 pair AspF and AspR for mutation of S276 to aspartic acid or AlaF and AlaR for mutation to  
250 alanine (Table S 4). The WT or mutated F2KP coding sequences were amplified by PCR  
251 using primers F2KP-F and F2KP-R (Table S 4), introducing restriction sites for AflIII (3' end)

252 and XbaI (5' end) and a stop codon. Using these restriction sites, digested PCR products were  
253 ligated into the pmcnEAVNG expression vector which allows expression in *E.coli* with an N-  
254 terminal GST tag and a T7 promoter for IPTG inducibility. Plasmids were transformed into  
255 Rosetta™2(DE3)pLysS Competent expression strain (Novagen).

256

#### 257 *Expression of GST-F2KP constructs in E. coli cells*

258 The three constructs, WT, S276E and S276A were expressed in *E.coli* and purified using the  
259 GST tag. Two independent expression experiments were performed (experiment 1 and  
260 experiment 2), each in triplicates. 200ml *E.coli* cultures were grown at 37°C with 100µg/ml  
261 ampicillin and 25µg/ml chloramphenicol and induced with 1mM IPTG at OD<sub>600</sub> values  
262 between 0.6 and 0.8. Cells were harvested by centrifugation after 2.5h of expression at 37°C.  
263 Each pellet was from 50ml bacterial culture. For purification of GST-F2KP, pellets were  
264 lysed in 2.5ml PBS with Complete protease inhibitor cocktail (Roche) with a probe sonicator.  
265 After clearing of the lysates, AP was carried out using GSH-agarose beads, with 167µl GSH-  
266 agarose bead suspension (Protino glutathione agarose 4B, Macherey-Nagel), a binding  
267 incubation of 30min at room temperature, 4 washes with 10x the volume of the bead  
268 suspension and elution in PBS with 100mM reduced glutathione (pH 8.0) 3 times 30min at  
269 room temperature.

270

#### 271 *F2KP activity assay*

272 F2KP activity of purified F2KP was measured as described in (40) (F-2,6-BP producing  
273 reaction) and (41) (measurement of generated F-2,6-BP by its activation of PFP and  
274 subsequent production of NADH produced from glycolytic enzymes).

275

#### 276 *Western blot quantification of F2KP concentration in AP eluates*

277 To test whether the differences in F2KP activity of eluates could be caused by differences in  
278 abundance in the eluate, we quantified the amount of F2KP in equal volumes of eluates by  
279 western blotting. Samples were prepared for SDS-PAGE with 25% 4xLDS (Life

280 Technologies, NP0008) and 20mM DTT and were incubated at 70°C for 10min. Two  
281 concentration series of an equal mix of all three eluates were loaded on each gel for relative  
282 quantitation. Individual eluates were examined in duplicates (expression 1) or triplicates  
283 (expression 2). 4-12% Bis-Tris Gels (Life Technologies) were run and protein was blotted  
284 onto nitrocellulose membrane using the iBlot® system. Two primary antibodies were used in  
285 parallel: anti-F2KP from rabbit, raised against amino acids 566-651 (42) and anti-GST from  
286 mouse (Thermo Scientific), both at a dilution of 1:1,000 overnight. Secondary antibodies  
287 were goat-anti-rabbit (IRDye®800CW, LI-COR) and goat-anti-mouse (IRDye®680RD, LI-  
288 COR). Bands were quantified using the ImageStudioLite (version 2) software.  
289

290

## 291 **Results**

### 292 *Circadian protein phosphorylation requires the canonical transcriptional oscillator*

293 We generated global proteomics and phosphoproteomics datasets for two independent  
294 circadian time courses and for two genotypes each – WT and the CCA1-OX line which has an  
295 impaired circadian oscillator (27). This resulted in four datasets: global protein and  
296 phosphopeptide datasets I (Zeitgeber time (ZT) 12 to ZT32) and datasets II (ZT24 to ZT48  
297 (CCA1-OX) or ZT52 (WT)) (Figure 1A,B). We removed outliers before conducting further  
298 statistical analysis (Supplementary Data S4).

299

300 We identified 2287 phosphopeptides in dataset I, 1664 in dataset II, which condensed to  
301 between 1000 and 1500 in each dataset after applying qpMerge (30) to remove duplicate  
302 phosphopeptides (Table 1A). These were from several hundred proteins in each dataset and  
303 over 1000 in both datasets together (Table 1B). In the global protein analysis, we identified  
304 1896 and 1340 proteins in dataset I and II, respectively, adding up to a total of 2501 for both  
305 datasets combined (Table 1A,B). To assess the circadian rhythmicity of each phosphopeptide  
306 or protein, we employed the non-parametric JTK\_CYCLE method (35) as it can be applied to  
307 time courses of only one cycle, taking the curve shape into account. Unless otherwise stated  
308 we considered periods of 22 to 26h and excluded continuously increasing or decreasing  
309 profiles from the group of rhythmic phosphopeptides or proteins. In dataset I, 606 (40%)  
310 phosphopeptides were rhythmic in the WT, in dataset II 100 (8.8%) based on the p-value of  
311 the individual timeseries. 338 (23%) (dataset I) and 26 (2.3%) (dataset II) were rhythmic after  
312 adjusting for multiple testing ('q-value' < 0.05) (36). The fraction of rhythmic proteins in the  
313 global proteomics analysis was smaller than in the case of phosphopeptides: 171 (9.0%) in  
314 dataset I, 45 (3.4%) in dataset II had JTK\_CYCLE p-values < 0.05. 6 proteins also had q-  
315 value < 0.05 in each dataset (0.32% in dataset I, 0.45% in dataset II). Phosphopeptides and  
316 proteins with JTK\_CYCLE p<0.05 in both datasets are listed in Table 2.

317

318 In the CCA1-OX line, 37 (2.5%) phosphopeptides had a JTK\_CYCLE p-value < 0.05 in  
319 dataset I, 17 (1.5%) in dataset II; in the global datasets, 122(6.4%) and 57 (4.3%) had a  
320 JTK\_CYCLE p-value < 0.05 in datasets I and II, respectively. After adjusting for multiple  
321 testing, only two significant identifications remained for the CCA1-OX phosphopeptides in  
322 dataset I and none in dataset II (Table 1A). This analysis suggests that a functional TTFL is  
323 required for most rhythmic protein phosphorylation.

324

325 For further whole-dataset analyses, we used JTK\_CYCLE p-value < 0.05 as a criterion for  
326 rhythmicity and treated results as reliable if rhythmic scores were obtained from separate  
327 analysis of each dataset. This approach is also supported by comparison with existing data:  
328 Among the phosphopeptides with  $p < 0.05$  and  $q > 0.05$  were phosphosites that were  
329 previously shown to be rhythmic with almost identical phases, such as RTT(pS)LPVDAIDS  
330 of WITH NO LYSINE (WNK) 1, and TL(pS)STPLALVGAK of CHLORIDE-CHANNEL-A  
331 (CLC-A) (Supplementary Data S3) (9). As expected, the global proteomic analysis did not  
332 quantify all the proteins identified by the phosphoproteomic enrichment (Figure 1 C,E). We  
333 found very few proteins with rhythms in abundance as well as rhythmic phosphopeptides (12  
334 in dataset I, 2 in dataset II). About half of the rhythmic phosphopeptides or proteins had  
335 rhythmic transcripts (Figure 1D,F).

336

337 Since *CCA1* is a morning-expressed gene, the CCA1-OX line might be expected to have a  
338 ‘morning-locked’ circadian oscillator. To test whether this observation applies at the protein  
339 abundance and phosphorylation level, we calculated the absolute value of the difference  
340 between CCA1-OX and WT ( $|CCA1-OX - WT|$ ) at each dawn and dusk time point (i.e. ZT12,  
341 24, 36 and 48) for time courses of all proteins or phosphopeptides that were rhythmic in WT  
342 ( $p$ -value < 0.05) and quantified in CCA1-OX. For each dawn – dusk pair, we determined  
343 whether the difference between CCA1-OX and WT was larger at dusk or at dawn and counted  
344 the number of such pairs as a coarse indication of the difference between the proteome or  
345 phosphoproteome of these two genotypes, for each dataset and time point pair (Table S 1).

346 CCA1-OX differed more from the WT at dusk rather than dawn, in all but one of the time  
347 point pairs (the exception was one of the smallest pairs, in global dataset II). This is consistent  
348 with a partially morning-locked circadian clock at the protein (modification) level, as  
349 expected from the role of CCA1 in the TTFL. The consistency of the dataset supports our  
350 interpretation, from the very few rhythmic identifications in CCA1-OX, that the TTFL is  
351 necessary for most of the rhythms observed in WT plants.

352

### 353 *Circadian rhythms of proteins in the global proteomics datasets*

354 We applied GO analysis to the global proteomics data, using rhythmic proteins at each peak  
355 time point as foreground and all other identified proteins as background (Supplementary Data  
356 S6). In both datasets, enriched GO terms in the WT at the end of the subjective day (ZT12  
357 and ZT36) were photosynthesis related terms, ‘response to glucose’, ‘regulation of protein  
358 dephosphorylation’ and oxidoreductase activity with NAD or NADP as acceptor. The latter  
359 was also enriched in the CCA1-OX in dataset I. In addition, in the CCA1-OX, two terms  
360 related to cell wall metabolic processes were enriched in both datasets during the subjective  
361 night (ZT20 and ZT44) (Supplementary Data S6).

362 Among rhythmic proteins shared between the datasets, we identified six for the WT, three for  
363 the CCA1-OX (Table 2D,E). One protein, INOSITOL 3-PHOSPHATE SYNTHASE 1  
364 (MIPS1, AT4G39800) was rhythmic with a peak at 24-28h in both datasets and both  
365 genotypes but with lower p-value and higher amplitude in the WT (Figure 2A). Two other  
366 examples of high-confidence rhythms in protein abundance are chloroplast BETA-  
367 AMYLASE 3 (BAM3) (Figure 2B) and the light-harvesting chlorophyll a/b binding protein  
368 LHCB2.2 (Figure 2C).

369

370 *WT phosphoproteomics data reveals rhythmic phosphoproteins with a variety of functions,*  
371 *including previously unknown phosphosite rhythms*

372 GO term enrichment within the peak time groups of the phosphoproteomics data revealed that  
373 only one GO term ('cotyledon development') was shared between the two datasets and the  
374 ZTs of enrichment are 16 h apart (Supplementary Data S6). Several terms were shared  
375 between the WT and the CCA1-OX in dataset I, most of them related to energy metabolism or  
376 ion homeostasis, and all of them were enriched at ZT24 or ZT28. Apart from overlap of exact  
377 GO IDs, we found enrichment of terms related to translation in the WT at 24h in both  
378 phosphoproteomics datasets, which is consistent with rhythmic phosphorylation of RPS6  
379 isoforms (Supplementary data S6, Table 2, Data S3) (9).

380 In agreement with the small number of consistently enriched GO terms and with (9), we  
381 found that the proteins for which we found rhythmic phosphosites in the WT are associated  
382 with a large variety of functions, such as translation initiation (RPS6A, RPS6B), nitrogen /  
383 amino acid metabolism or transport (NIA2, NRT1.7, CLC-A), light harvesting (CAB4) or  
384 flowering (COL-9).

385 In our datasets we also found previously unknown phosphosite rhythms, such as on  
386 ASPARAGINE SYNTHETASE (ASN) 2, SWEET12, PLASMA MEMBRANE INTRINSIC  
387 PROTEIN (PIP) 2;7 and VARICOSE RELATED (VCR) (Figure 3, and see discussion).

388

389 *Very few proteins are rhythmically phosphorylated in the CCA1-OX*

390 Only 2 phosphopeptides with  $p < 0.05$  for the CCA1-OX appear in both datasets (Table 2B): A  
391 phosphopeptide of a Leucine rich repeat protein kinase (AT2G33830) and a dormany/auxin  
392 associated family protein (AT1G51805). The latter showed a significant increase in its total  
393 protein abundance in dataset I (Table 2B), therefore changes may be due to increasing protein  
394 expression in constant light.

395

396 *'Phospho-dawn': most rhythmic phosphopeptides peak in the subjective morning*

397 Analysis of the number of phosphopeptides that peak at each time point revealed that 45%  
398 (dataset I) and 73% (dataset II) of rhythmic phosphopeptides peak around subjective dawn in  
399 the WT (Figure 4A, Figure 5A,B). This is in agreement with previous observations in

400 *Ostreococcus* and *Arabidopsis* (9,43). By contrast, in the global proteomics dataset no  
401 tendency for increased abundance at dawn was observed (Figure 4C, Figure 5C,D). These  
402 observations hold true when using an alternative ANOVA analysis, detecting change rather  
403 than rhythmicity, with a p-value cutoff of  $p < 0.05$  (Figure S 1). Therefore, the preponderance  
404 of ‘phospho dawn’ patterns is more likely due to (de)phosphorylation events rather than to  
405 changes in the abundance of the cognate proteins.

406 Interestingly, almost all of the few phosphopeptides with JTK\_CYCLE p-value  $< 0.05$  also  
407 peaked at subjective dawn in the CCA1-OX plants (Figure 4B, Figure 5A,B, Figure S 1),  
408 which suggests residual rhythmicity phased similarly to the WT. To expand the search for  
409 rhythms in the CCA1-OX, we tested whether there are rhythmic phosphopeptides with shorter  
410 periods that would have been excluded from the analysis above. We repeated the  
411 JTK\_CYCLE analysis, allowing periods down to 12 h. Hardly any phosphopeptides had  
412 periods of less than 22 h in the WT, while the majority of phosphopeptides had a predicted  
413 period of 12 or 16 h in the CCA1-OX (Figure 5E,F). Interestingly, the majority of those short-  
414 period rhythmic phosphopeptides also peaked at 24 h or 48 h (Figure 5A,B). In conclusion, in  
415 both of our independent WT phosphoproteomics datasets, the majority of phosphopeptides  
416 peak around subjective dawn, and this ‘phospho dawn’ may not be completely abolished by  
417 disruption of the TTFL.

418

419 *Kinase prediction suggests CDPK/SnRK family members target dawn phased*

420 *phosphopeptides*

421 We reasoned that there may be a kinase activity that is present predominantly around  
422 subjective dawn which is either very robustly dawn-timed by the TTFL even when it is  
423 strongly impaired, or an alternative oscillator, such as an NTO, contributes to the dawn  
424 phased kinase activity. Characterisation of the phospho-dawn peptides could help to identify  
425 either a very robust dawn-phased TTFL output, or potentially consequences of an NTO. For  
426 this reason, we focused on the dawn peaking phosphopeptides to identify candidate kinases,  
427 using phosphosite motif analysis and kinase prediction. In these analyses we used the ZT24 or



428 ZT48 peaking rhythmic (JTK\_CYCLE p-value <0.05) phosphopeptides as foreground and all  
429 other identified phosphopeptides as background. No target site motifs were significantly over-  
430 represented in a consistent way between datasets (Figure S 2, Figure S 3). For predicting  
431 candidate kinases, we searched for enrichment of kinase groups that target phosphopeptides  
432 with JTK\_CYCLE p-value <0.05 (Table 3) using the GPS3 resource. In the WT, both datasets  
433 share enrichment of CMGC kinase groups such as MAPK, and CAMK groups. The latter  
434 caught our attention since it is the only consistently enriched group in both genotypes and  
435 both datasets. The CAMK group was also consistently enriched among significantly changing  
436 phosphopeptides scored using ANOVA p-value < 0.05 (Table S 2).

437 The CAMK group in plants contains the CDPK/SnRK family of kinases with 89 members  
438 (44) in the EKPD database (45) that informs GPS3. Interestingly, among the phospho dawn  
439 peptides we found phosphosites that may be direct or indirect SnRK1 target proteins  
440 according to two proteomics studies (46,47): NITRATE REDUCTASE (NIA) 1 and 2 and the  
441 bifunctional enzyme F2KP (Figure S 4, Table S 3). Interestingly, nitrate reductases have been  
442 reported as classical SnRK1 targets in other species (48). In light-dark cycles, NIA1 and  
443 NIA2 protein abundances are rhythmic (25), while in our analysis under constant light NIA1  
444 protein was not detected in the global analysis and NIA2 protein abundance changed  
445 significantly (Figure S 4B) but not in phase with the phosphosites, suggestive of regulated  
446 (de)phosphorylation. Another indication of increased SnRK1 activity at subjective dawn are  
447 rhythms in phosphopeptides and abundance of the protein FCS-LIKE ZINC FINGER (FLZ)6  
448 (Figure S 5): transcriptional up-regulation of *FLZ6* by SnRK1 signalling has previously been  
449 shown (49,50). In a dataset with WT seedlings in constant light (51), the *FLZ6* transcript peaks  
450 4h before the FLZ6 protein in our dataset.

451

#### 452 *Rhythmically phosphorylated kinases and phosphatases*

453 Since kinases and phosphatases themselves can be regulated by phosphorylation, we were  
454 interested in rhythmic phosphopeptides of kinases and phosphatases. Identification of

455 rhythmic kinase or phosphatase activities in the WT could help to discover components of  
456 clock output pathways that are mediated *via* protein phosphorylation.  
457 For two kinases, CRK8 and AT5G61560, we found rhythmic phosphopeptides in the WT  
458 where protein abundance did not oscillate in parallel, indicating that rhythmicity is due to  
459 phosphorylation rather than changes in protein abundance (Figure S 6). CRK8 is a member of  
460 the CDPK-SnRK1 superfamily (44), To our knowledge no specific functions have been  
461 investigated for either of these kinases.  
462 All rhythmically phosphorylated phosphatases in our data are members of the protein  
463 phosphatase 2C (PP2C) family (Figure S 7) and were classified as rhythmic only in the WT.  
464 PP2C G1 (Figure S 7A) is involved in ABA dependent salt stress response and, in contrast to  
465 PP2CAs is a positive ABA signalling regulator (52) but to our knowledge, no reports exist on  
466 the functional relevance of its own phosphorylation. AT3G51470 is also a PP2C G family  
467 member, was only rhythmic in dataset I and no functional information is available (53). The  
468 final PP2C POLTERGEIST (POL, Figure S 7C) is involved in stem cell regulation (54). In  
469 the CCA1-OX data, the profiles for the kinases and phosphatases discussed above can show  
470 some similarity to the WT pattern but none were classified as rhythmic by JTK\_CYCLE. The  
471 biochemical mechanisms underlying the relatively robust phosphoprotein rhythms in the WT  
472 should prove easier to investigate than any remaining rhythmicity in the CCA1-OX.  
473  
474 *Phospho-null mutation of Ser267 of the enzyme F2KP enhances F6P-2kinase activity in-vitro*  
475 As an example of how our datasets can be used to investigate new clock output pathways, we  
476 analysed the molecular function of a phosphosite of the bifunctional enzyme F2KP. Several  
477 phosphosites were detected in F2KP with only Ser276 showing a circadian rhythm in the WT,  
478 in dataset II only but at a very high significance level (Figure S 4C, Supplementary Data S3).  
479 One F2KP peptide was detected in the global protein analysis of dataset II. Its changes over  
480 the timecourse are not significant and do not parallel the Ser276 phosphopeptide, therefore it  
481 is unlikely that the rhythm in Ser276 phosphorylation is caused by changes in F2KP protein  
482 abundance.

483

484 We tested whether the Ser276 phosphorylation site is relevant for F2KP function, since this  
485 site is highly conserved with other plant species (Figure S 8A), and a very specific enzymatic  
486 assay has been described (41,55). Maximum F6P,2K activity was measured of GST-tagged  
487 phosphomimetic mutants S276D and S276A, and the unmutated WT control enzyme *in vitro*.  
488 Two independent preparations (bacterial expression and purification using a GST tag) were  
489 tested to ensure reproducibility. Equivalence of the amounts of expressed F2KP protein in  
490 assays was verified by western blotting with two different antibodies (Figure 6C, Figure S  
491 8D). S276A had an approximately 2.5 fold increased activity compared to the unmutated  
492 version, while S276D had only slightly increased activity (Figure 6 A,B, Figure S 8B,C,E).  
493 The rhythmicity observed at this phosphosite is therefore consistent with a rhythmic input to  
494 F2KP function in central carbon metabolism.

495

## 496 **Discussion**

497 This study focusses on global and phospho-proteomic timeseries in *Arabidopsis* plants  
498 harvested under constant light conditions, where rhythmicity is driven by the circadian clock.  
499 In WT plants, we tested the prevalence of circadian rhythms in protein phosphorylation and  
500 abundance, which has rarely been reported. In the CCA1-OX transgenic line, we tested the  
501 importance of the clock gene circuit for that rhythmic regulation, given that markers of a  
502 Non-Transcriptional Oscillator (NTO) are rhythmic in *Arabidopsis*, and that protein  
503 phosphorylation drives the best-characterised NTO in cyanobacteria.

504

505 *Could an NTO contribute to the phospho-dawn?*

506 CCA1-OX transgenic lines have been widely used as an approximation of a plant without a  
507 functional clock. In this line we found very few rhythmic phosphopeptides and proteins, and  
508 those with statistical significance typically had less convincing waveforms than rhythms in  
509 the WT (Table 1). Therefore, if an NTO exists in *Arabidopsis*, it confers rhythmicity only to  
510 very few of the phosphosites we detected. Intriguingly, in both datasets, we still observe the

511 phospho-dawn phenomenon in the CCA1-OX (Figure 4, Figure 5, Figure S 1), whereas a  
512 uniform phase distribution would be expected in the noise-driven fluctuations of an  
513 arrhythmic plant. It remains possible that an NTO controls this fraction of dawn-phased  
514 phosphorylation, albeit too weakly to yield robust rhythms, whereas the majority of  
515 phosphoprotein rhythmicity requires a functioning clock gene circuit. We cannot exclude that  
516 some rhythmicity of that canonical gene circuit remains even in the CCA1-OX, for example  
517 as the CaMV 35S promoter does not confer strong expression in all tissues (56). Additional  
518 experiments, such as phosphoproteomics in other arrhythmic mutants, testing other post-  
519 translational markers such as redox modifications, and identifying NTO outputs other than  
520 PRX over-oxidation (19) and  $Mg^{2+}$  rhythms (20,21) might further define the effects of a  
521 potential NTO in *Arabidopsis*.

522

### 523 *Proteins with rhythmic abundance*

524 We found that the proportion of rhythmic phosphopeptides is larger than for protein  
525 abundance, but smaller than for rhythmic transcripts (Table 1). The set of rhythmic proteins  
526 does not support extensive inference, though we note that the three examples of rhythmic  
527 proteins in Figure 2 all follow the rhythmic regulation of their cognate transcripts. MIPS1  
528 (Figure 2A) is transcriptionally induced by light, acting through FAR-RED ELONGATED  
529 HYPOCOTYLS (FHY)3 and FAR-RED IMPAIRED RESPONSE (FAR)1 at the transition  
530 from darkness to light in light-dark cycles, and enhances myo-inositol abundance, which in  
531 turn limits oxidative stress at the onset of photosynthesis (57,58). Rhythmic *MIPS1* transcript  
532 abundance peaks towards the end of the subjective night in constant light (59,60), before a  
533 protein peak shortly after subjective dawn. The rhythmic control of MIPS1 abundance is  
534 consistent with anticipation of light-induced oxidative stress, providing a potential  
535 physiological function in addition to the subsequent, light-responsive induction of myo-  
536 inositol production.

537 BAM3 (Figure 2B) is the dominant beta-amylase contributing to starch degradation (61). The  
538 circadian clock is key for the timing of night-time starch degradation (62). In light-dark

539 cycles, *BAM3* transcript abundance drops at the beginning of the day and increases during the  
540 night (63,64), and this pattern persists in constant light (59,60). We observe a protein  
541 abundance pattern that matches the transcript dynamics, indicating that the transcriptional  
542 control may be responsible for the protein rhythm. This is also the case for LHCB2.2 (Figure  
543 2C), a component of the photosystem II light harvesting complex (60).

544

#### 545 *Proteins with newly discovered phosphopeptide rhythms*

546 We show four examples of newly discovered phosphopeptide rhythms in Figure 3. ASN2  
547 (Figure 3A) is one out of three described *Arabidopsis* asparagine synthetases which catalyse  
548 the transfer of an amino group from glutamine to aspartate, producing asparagine and  
549 glutamate, but ASN2 may also directly use ammonia as a substrate (65,66). The two most  
550 expressed asparagine synthetase enzymes in *Arabidopsis* are ASN1 and ASN2 (65), and in  
551 contrast to ASN1, the physiological function of ASN2 is less well understood. We did not  
552 find any evidence for ASN2 protein abundance rhythms (Figure 3A), indicating that the  
553 phosphosite's peak near subjective dawn is due to rhythmic kinase and / or phosphatase  
554 action. Interestingly, the ammonia transporter AMT1;1 also has a rhythmic phosphosite with  
555 a temporal profile that parallels the ASN2 peptide (Data S3, Table 2). The presence of  
556 rhythmic phosphosites of proteins involved in nitrate metabolism or transport in our data and  
557 (9) supports the notion that nitrogen related processes are under control of the circadian clock  
558 at the post-translational level, in part through rhythmic AMT1;1 and ASN2 phosphorylation.

559

560 In water transport, our results demonstrate a previously undiscovered phosphosite rhythm on  
561 the aquaporin PLASMA MEMBRANE INTRINSIC PROTEIN (PIP)2;7 (Figure 3B).

562 According to (67) this phosphosite is a CPK1 and CPK34 target, and its abundance decreases  
563 in response to ABA treatment (68). In response to salt stress, the entire protein is internalised  
564 from the plasma membrane, with a concomitant reduction in hydraulic conductivity (69),  
565 indicating that decreasing PIP2;7 activity limits water loss. Rhythmic phosphorylation of  
566 other aquaporins was previous demonstrated in constant light or darkness (9,70). Therefore,

567 PIP2;7 may, together with other aquaporins, mediate circadian clock regulation of hydraulic  
568 conductivity or high salinity response through its phosphorylation status.  
569 In carbon transport, a newly discovered phosphosite rhythm was found for the sucrose efflux  
570 transporter SWEET12 (Figure 3C) (71). To our knowledge, the function of this phosphosite is  
571 unknown but one may speculate that this rhythm could reflect circadian control of carbon  
572 reallocation.  
573 Finally, we have high confidence in the rhythmicity of a phosphopeptide of the putative RNA  
574 decapping protein VARICOSE RELATED (VCR) (Figure 3D). VCR and its close homologue  
575 VARICOSE (VCS) interact with and are phosphorylated by SnRK2.6 and SnRK2.10 at  
576 several serines (72,73). While the VCR phosphosite shown in Fig S6D is not one of the  
577 phosphosites identified by (73), SnRK2.10 phosphorylates an almost identical site on VCS  
578 (TLSYPTPPLNLQpSPR). Therefore, it is very likely that the corresponding site on VRC is  
579 also a SnRK2.10 target.  
580 Altogether, these examples demonstrate how our data can be used to generate hypotheses on  
581 clock output pathways affecting different aspects of plant physiology through  
582 phosphorylation.

583

#### 584 *A rhythmic F2KP phosphosite is biochemically relevant*

585 The specific roles of most of the rhythmic phosphorylation sites identified in our study have  
586 not been investigated. To exemplify in an experimental approach how circadian  
587 phosphorylation of a protein can be linked to its function, we analysed the effect of a  
588 phosphosite mutation on the activity of the enzyme F2KP. F2KP is one of the regulators of  
589 carbon partitioning into starch and sucrose (74) and is necessary to maintain normal growth in  
590 fluctuating light conditions (75). With its kinase domain it can synthesize F-2,6-BP from F-6-  
591 P, and with its phosphatase domain it catalyzes the reverse reaction (74).  
592 The phosphosite of interest, Ser276, is within the plant-specific regulatory N-terminal domain  
593 (42,76) but is not among the phosphosites in the known 14-3-3 binding site (77). Ser276 is  
594 regulated by SnRK1 (46) and is conserved in many plant species (Figure S 8A).

595 Our *in-vitro* F-6-P<sub>2</sub> kinase activity measurement experiments showed that substitution of  
596 Ser276 by Ala increases F2KP's kinase activity. It is unknown whether *in vitro* expressed  
597 F2KP is phosphorylated at Ser276 or not. However, comparison of Ser276 mutation to Ala  
598 with the WT and with mutation to Asp, suggests that a lack of negative charge at position 276  
599 leads to increased kinase activity. In dataset II, pSer276 decreased gradually during the  
600 subjective day (Figure S4C). Assuming that the phospho mimic / WT and null mutations  
601 reflect the behaviour of the phosphorylated and non-phosphorylated site, respectively, we  
602 extrapolate that towards the end of the day, more F-2,6-BP is produced and therefore starch  
603 synthesis is favoured over UDP-glucose and sucrose synthesis. Indeed, F-2,6-BP levels in the  
604 plant increase slowly across the day in short day conditions (77). Testing the function of these  
605 mutations *in planta* will be interesting to determine whether this phosphosite has  
606 physiological relevance, in addition to biochemical effectiveness.

607

#### 608 *Phospho-dawn is likely mediated by several different kinases*

609 We aimed to characterise the phospho-dawn phenomenon as it may point to novel dawn-  
610 specific circadian clock output through post-translational mechanisms. Although the striking  
611 abundance of dawn-phased phosphopeptides could partly be biased towards the easily  
612 detectable or abundant phosphopeptides of our dataset, it is consistent with highest transcript  
613 expression of kinases and phosphatases at the end of the night in diel time courses (26,78).  
614 Our kinase prediction revealed enrichment of some CMGC subgroups, such as MAPK, CK2,  
615 GSK, DYRK, CDK or DAPK. CK2 is involved in the circadian clock function in Arabidopsis  
616 by phosphorylating CCA1 (4,79). A previous study reported enrichment of predominantly  
617 CK2 predictions among significantly changing phosphopeptides (9). Roles for MAPK and  
618 GSK have been reported for the circadian clock function in other eukaryotes (80–83).  
619 However, the most consistently enriched group of kinases at subjective dawn in our datasets  
620 is the CAMK group (Table 3, Table S 2), which comprises the 89 members of the CDPK-  
621 SnRK superfamily of kinases.

622 All of these 89 CDPK-SnRK member are potential candidates for causing the observed  
623 phospho-dawn. Not all of these kinases have been studied in much detail, and for the majority  
624 of rhythmic phosphopeptides no experimental evidence for kinase specificities exists.  
625 However, making use of literature on existing kinase – target pairs can help to narrow down  
626 candidates. For example, as mentioned above, CPK1, CPK34 and likely SnRK2.10  
627 phosphorylate dawn-peaking phosphosites shown in Figure 3. In addition, SnRK and CPK /  
628 CDPK kinases can themselves be regulated by phosphorylation (44). CRK8, of which we  
629 found a very prominently dawn-peaking rhythmic phosphopeptide (Figure S 6A), is therefore  
630 another candidate phospho-dawn kinase.

631 We also show that several previously reported SnRK1 regulated sites are rhythmic with peaks  
632 around subjective dawn including phosphopeptides of F2KP and nitrate reductases NIA1 and  
633 NIA2 (Figure S 4). Additional indication comes from the protein FLZ6 which is  
634 transcriptionally induced by and interacts with SnRK1 and may serve as a platform for  
635 SnRK1 signalling (84). FLZ6 protein abundance and two phosphopeptides were rhythmic in  
636 the WT with a peak around subjective dawn (Figure S 5). SnRK1 may be a particularly  
637 relevant candidate as its involvement in circadian timing has previously been reported (85–  
638 87) and as it is an important metabolic hub. In normal light-dark conditions the morning is  
639 associated with profound metabolic changes in plants, such as the transition from using starch  
640 to direct photoassimilates, or to the alternative, a starvation response if light intensities remain  
641 low while starch is almost depleted.

642 SnRK1 signaling is regarded as antagonistic to TOR signaling (47). Nevertheless, RPS6A and  
643 RPS6B phosphosites that are targets of the TOR signalling kinase S6K, are rhythmically  
644 phosphorylated in the WT, and in dataset I also in the CCA1-OX (Table 2, supplementary  
645 data S3 and (9)), with peaks at subjective dawn. This adds to growing evidence that the  
646 interplay between SnRK1 and TOR may be more complex than simply antagonistic (88). In  
647 fact, the above-mentioned SnRK1 induced FLZ6 negatively feeds back to SnRK1, and this  
648 has been suggested as a mechanism to allow sufficient TOR activity in spite of high SnRK1



649 activity (50), which may allow RPS6 phosphorylation to peak at approximately the same time  
650 as SnRK1 activity.

651

652 Altogether, the identities of the phospho dawn peptides in our study, along with their known  
653 and predicted kinases suggest that phospho-dawn is caused not by a single kinase but several  
654 members of the SnRK-CDPK family and also potentially kinases outside this family such as  
655 S6K. Further experimentation is required to give evidence for involvement of any such  
656 kinases in phospho-dawn, such as time courses of kinase activity and time-resolved  
657 phosphoproteomics in mutants of specific candidate kinases. Finding mechanisms that  
658 connect the canonical oscillator to prominent post-translational changes at dawn could reveal  
659 major clock output pathways that may control a wide range of physiological functions and  
660 expand our understanding of how the circadian oscillator increases plant fitness.

661

## 662 **Acknowledgements**

663 We thank Lisa Imrie, Katalin Kis and Helle K Mogensen for expert technical support.

664

## 665 **Funding**

666 This work was supported by the Wellcome Trust [096995/Z/11/Z] and BBSRC, and EPSRC  
667 awards [BB/D019621] and [BB/J009423].

668

## 669 **Data availability**

670 The data are publicly available in the pep2pro database (31) at <http://fgcz-pep2pro.uzh.ch> (Assembly  
671 names ‘ed.ac.uk Global I’, ‘ed.ac.uk Global II’, ‘ed.ac.uk Phospho I’, ‘ed.ac.uk Phospho II’) and have  
672 been deposited to the ProteomeXchange Consortium (<http://proteomecentral.proteomexchange.org>) via  
673 the PRIDE partner repository (32) with the dataset identifier PXD009230. Exported .csv files from  
674 Progenesis with all peptide and protein quantifications can be found in the online supplementary  
675 material (Data S1 and S2).

## References

1. Pokhilko, A. *et al.* The clock gene circuit in Arabidopsis includes a repressilator with additional feedback loops. *Mol. Syst. Biol.* **8**, 574 (2012).
2. Fogelmark, K. & Troein, C. Rethinking Transcriptional Activation in the Arabidopsis Circadian Clock. *PLoS Comput. Biol.* **10**, e1003705 (2014).
3. van Ooijen, G. & Millar, A. J. Non-transcriptional oscillators in circadian timekeeping. *Trends Biochem. Sci.* **37**, 484–92 (2012).
4. Daniel, X., Sugano, S. & Tobin, E. M. CK2 phosphorylation of CCA1 is necessary for its circadian oscillator function in Arabidopsis. *Proc. Natl. Acad. Sci. U. S. A.* **101**, 3292–7 (2004).
5. Nishiwaki, T. *et al.* Role of KaiC phosphorylation in the circadian clock system of *Synechococcus elongatus* PCC 7942. *Proc. Natl. Acad. Sci. U. S. A.* **101**, 13927–13932 (2004).
6. Maier, B. *et al.* A large-scale functional RNAi screen reveals a role for CK2 in the mammalian circadian clock. *Genes Dev.* **23**, 708–718 (2009).
7. Yang, Y., Cheng, P., He, Q., Wang, L. & Liu, Y. Phosphorylation of FREQUENCY protein by casein kinase II is necessary for the function of the Neurospora circadian clock. *Mol. Cell. Biol.* **23**, 6221–8 (2003).
8. Kusakina, J. & Dodd, A. N. Phosphorylation in the plant circadian system. *Trends Plant Sci.* 1–9 (2012). doi:10.1016/j.tplants.2012.06.008
9. Choudhary, M. K., Nomura, Y., Wang, L., Najagami, H. & Somers, D. E. Quantitative circadian phosphoproteomic analysis of Arabidopsis reveals extensive clock control of key components in physiological, metabolic and signaling pathways. *Mol. Cell. Proteomics* **14**, 2243–2260 (2015).
10. Leloup, J. C. & Goldbeter, A. Toward a detailed computational model for the mammalian circadian clock. *Proc Natl Acad Sci U S A* **100**, 7051–7056 (2003).
11. Baker, C. L., Loros, J. J. & Dunlap, J. C. The circadian clock of *Neurospora crassa*. *FEMS Microbiol. Rev.* **36**, 95–110 (2012).
12. Takahashi, J. S. Transcriptional architecture of the mammalian circadian clock. *Nat. Rev. Genet.* (2016). doi:10.1038/nrg.2016.150
13. Mauvoisin, D. *et al.* Circadian clock-dependent and -independent rhythmic proteomes implement distinct diurnal functions in mouse liver. *Proc. Natl. Acad. Sci. U. S. A.* (2013). doi:10.1073/pnas.1314066111
14. Lück, S., Thurley, K., Thaben, P. F. & Westermark, P. O. Rhythmic Degradation Explains and Unifies Circadian Transcriptome and Proteome Data. *Cell Rep.* 741–751 (2014). doi:10.1016/j.celrep.2014.09.021
15. Choudhary, M. K., Nomura, Y., Shi, H., Nakagami, H. & Somers, D. E. Circadian Profiling of

- the Arabidopsis Proteome Using 2D-DIGE. *Front. Plant Sci.* **7**, 1–14 (2016).
16. Nakajima, M. *et al.* Reconstitution of circadian oscillation of cyanobacterial KaiC phosphorylation in vitro. *Science* **308**, 414–5 (2005).
  17. O’Neill, J. S. *et al.* Circadian rhythms persist without transcription in a eukaryote. *Nature* **469**, 554–558 (2011).
  18. Neill, J. S. O. & Reddy, A. B. Circadian clocks in human red blood cells. *Nature* **469**, 498–503 (2011).
  19. Edgar, R. S. *et al.* Peroxiredoxins are conserved markers of circadian rhythms. *Nature* **485**, 459–464 (2012).
  20. Feeney, K. A. *et al.* Daily magnesium fluxes regulate cellular timekeeping and energy balance. *Nature* **532**, 375–379 (2016).
  21. Henslee, E. A. *et al.* Rhythmic potassium transport regulates the circadian clock in human red blood cells. *Nat. Commun.* **8**, (2017).
  22. Reddy, A. B. *et al.* Circadian orchestration of the hepatic proteome. *Curr. Biol.* **16**, 1107–15 (2006).
  23. Robles, M. S., Cox, J. & Mann, M. In-Vivo Quantitative Proteomics Reveals a Key Contribution of Post-Transcriptional Mechanisms to the Circadian Regulation of Liver Metabolism. *PLoS Genet.* **10**, (2014).
  24. Robles, M. S. *et al.* Phosphorylation Is a Central Mechanism for Circadian Control of Metabolism and Physiology. *Cell Metab.* **0**, 35–48 (2016).
  25. Uhrig, R. G. *et al.* Diurnal dynamics of the Arabidopsis rosette proteome and phosphoproteome. *Plant Cell Environ.* 821–841 (2020). doi:10.1111/pce.13969
  26. Uhrig, R. G., Schläpfer, P., Roschitzki, B., Hirsch-Hoffmann, M. & Gruissem, W. Diurnal changes in concerted plant protein phosphorylation and acetylation in Arabidopsis organs and seedlings. *Plant J.* **99**, 176–194 (2019).
  27. Wang, Z. Y. & Tobin, E. M. Constitutive expression of the CIRCADIAN CLOCK ASSOCIATED 1 (CCA1) gene disrupts circadian rhythms and suppresses its own expression. *Cell* **93**, 1207–17 (1998).
  28. Krahmer, J., Hindle, M. M., Martin, S. F., Bihan, T. Le & Millar, A. J. in *Circadian Rhythm. Biol. Clocks* **551**, 405–431 (Elsevier Inc., 2015).
  29. Elias, J. E. & Gygi, S. P. Target-Decoy Search Strategy for Mass. *Methods Mol. Biol.* **604**, 55–71 (2010).
  30. Hindle, M. M. *et al.* qpMerge: Merging different peptide isoforms using a motif centric strategy. *bioRxiv* **047100**, (2016).
  31. Baerenfaller, K. *et al.* pep2pro: a new tool for comprehensive proteome data analysis to reveal

- information about organ-specific proteomes in *Arabidopsis thaliana*. *Integr. Biol. (Camb)*. **3**, 225–37 (2011).
32. Vizcaíno, J., Deutsch, E. & Wang, R. ProteomeXchange provides globally coordinated proteomics data submission and dissemination. *Nat. Biotechnol.* **32**, 223–226 (2014).
  33. R Core Team. R: A Language and Environment for Statistical Computing. (2015). at <<http://www.r-project.org/>>
  34. Suzuki, R. & Shimodaira, H. pvclust: Hierarchical Clustering with P-Values via Multiscale Bootstrap Resampling. (2015). at <<http://cran.r-project.org/package=pvclust>>
  35. Hughes, M. E., Hogenesch, J. B. & Kornacker, K. JTK\_CYCLE: An Efficient Nonparametric Algorithm for Detecting Rhythmic Components in Genome-Scale Data Sets. *J. Biol. Rhythms* **25**, 372–380 (2010).
  36. Benjamini, Y. & Hochberg, Y. Controlling the False Discovery Rate : A Practical and Powerful Approach to Multiple Testing. *J R Stat. Soc B* **57**, 289–300 (1995).
  37. Xue, Y. *et al.* GPS 2.0: Prediction of kinase-specific phosphorylation sites in hierarchy 10.1074/mcp.M700574-MCP200. *Mol Cell Proteomics* M700574--MCP200 (2008). at <<http://www.mcponline.org/cgi/content/abstract/M700574-MCP200v1>>
  38. Liu, Z. *et al.* GPS 3.0: web servers for the prediction of protein post-translational modification sites. *Manuscr. Submitt.* (2015).
  39. Alexa, A., Rahnenführer, J. & Lengauer, T. Improved scoring of functional groups from gene expression data by decorrelating GO graph structure. *Bioinformatics* **22**, 1600–7 (2006).
  40. Kalt-torres, W., Kerr, P. S., Usuda, H. & Huber, S. C. Diurnal Changes in Maize Leaf Photosynthesis. *Plant Physiol.* **83**, 283–288 (1987).
  41. Van Schaftingen, E., Lederer, B., Bartrons, R. & Hers, H.-G. A Kinetic Study of Pyrophosphate : Fructose-6-Phosphate Phosphotransferase from Potato Tubers Application to a Microassay of Fructose 2,6-Bisphosphate. *Eur. J. Biochem.* **129**, 191–195 (1982).
  42. Villadsen, D. & Nielsen, T. H. N-terminal truncation affects the kinetics and structure of fructose-6-phosphate 2-kinase/fructose-2,6-bisphosphatase from *Arabidopsis thaliana*. *Biochem. J.* **359**, 591–7 (2001).
  43. Noordally, Z. B. *et al.* Circadian protein regulation in the green lineage I. A phospho-dawn anticipates light onset before proteins peak in daytime. *bioRxiv* (2018). doi:<http://dx.doi.org/10.1101/287862>
  44. Hrabak, E. M. *et al.* The Arabidopsis CDPK-SnRK Superfamily of Protein Kinases. *Plant Physiol.* **132**, 666–680 (2003).
  45. Wang, Y. *et al.* EKPD: A hierarchical database of eukaryotic protein kinases and protein phosphatases. *Nucleic Acids Res.* **42**, 496–502 (2014).

46. Cho, H. Y., Wen, T. N., Wang, Y. T. & Shih, M. C. Quantitative phosphoproteomics of protein kinase SnRK1 regulated protein phosphorylation in Arabidopsis under submergence. *J. Exp. Bot.* **67**, 2745–2760 (2016).
47. Nukarinen, E. *et al.* Quantitative phosphoproteomics reveals the role of the AMPK plant ortholog SnRK1 as a metabolic master regulator under energy deprivation. *Sci. Rep.* **6**, 31697 (2016).
48. Sugden, C., Donaghy, P. G., Halford, N. G. & Hardie, D. G. Two SNF1-related protein kinases from spinach leaf phosphorylate and inactivate 3-hydroxy-3-methylglutaryl-coenzyme A reductase, nitrate reductase, and sucrose phosphate synthase in vitro. *Plant Physiol* **120**, 257–274 (1999).
49. Jamsheer, M. K. & Laxmi, A. Expression of Arabidopsis FCS-like Zinc finger genes is differentially regulated by sugars, cellular energy level, and abiotic stress. *Front. Plant Sci.* **6**, 1–12 (2015).
50. Jamsheer, M. K. *et al.* The FCS-like zinc finger scaffold of the kinase SnRK1 is formed by the coordinated actions of the FLZ domain and intrinsically disordered regions. *J. Biol. Chem.* **293**, 13134–13150 (2018).
51. Covington, M. F., Maloof, J. N., Straume, M., Kay, S. a & Harmer, S. L. Global transcriptome analysis reveals circadian regulation of key pathways in plant growth and development. *Genome Biol.* **9**, R130 (2008).
52. Liu, X. *et al.* AtPP2CG1, a protein phosphatase 2C, positively regulates salt tolerance of Arabidopsis in abscisic acid-dependent manner. *Biochem. Biophys. Res. Commun.* **422**, 710–715 (2012).
53. Sahoo, S. A., Raghuvanshi, R., Srivastava, A. K. & Suprasanna, P. in *Protein Phosphatases Stress Manag. Plants Funct. Genomic Perspect.* (ed. Pandey, G. K.) 163–201 (Springer International Publishing, 2020). doi:10.1007/978-3-030-48733-1\_10
54. Yu, L. P., Miller, A. K. & Clark, S. E. POLTERGEIST encodes a protein phosphatase 2C that regulates CLAVATA pathways controlling stem cell identity at Arabidopsis shoot and flower meristems. *Curr. Biol.* **13**, 179–188 (2003).
55. Kalt-Torres, W. & Huber, S. C. Diurnal Changes in Maize Leaf Photosynthesis. *Plant Physiol.* **83**, 283–288 (1987).
56. Holtorf, S., Apel, K. & Bohlmann, H. Comparison of different constitutive and inducible promoters for the overexpression of transgenes in Arabidopsis thaliana. *Plant Mol. Biol.* **29**, 637–646 (1995).
57. Donahue, J. L. *et al.* The Arabidopsis thaliana myo-inositol 1-phosphate synthase1 gene is required for myo-inositol synthesis and suppression of cell death. *Plant Cell* **22**, 888–903 (2010).

58. Ma, L. *et al.* Arabidopsis FHY3 and FAR1 Regulate Light- Induced myo-Inositol Biosynthesis and Oxidative Stress Responses by Transcriptional Activation of MIPS1. *Mol. Plant* **9**, 541–557 (2016).
59. Edwards, K. D. *et al.* FLOWERING LOCUS C Mediates Natural Variation in the High-Temperature Response of the Arabidopsis Circadian Clock. *Plant Cell* **18**, 639–650 (2006).
60. Covington, M. F. & Harmer, S. L. The Circadian Clock Regulates Auxin Signaling and Responses in Arabidopsis. *PLoS Biol.* **5**, 1773–1784 (2007).
61. Monroe, J. D. Involvement of five catalytically active Arabidopsis  $\beta$ -amylases in leaf starch metabolism and plant growth. *Plant Direct* **4**, 1–10 (2020).
62. Graf, A., Schlereth, A., Stitt, M. & Smith, A. M. Circadian control of carbohydrate availability for growth in Arabidopsis plants at night. *Proc. Natl. Acad. Sci. U. S. A.* **107**, 9458–9463 (2010).
63. Smith, S. *et al.* Diurnal changes in the transcriptome encoding enzymes of starch metabolism provide evidence for both transcriptional and posttranscriptional regulation of starch metabolism in arabidopsis leaves. *Plant Physiol.* **136**, 2687–2699 (2004).
64. Bläsing, O. E. *et al.* Sugars and circadian regulation make major contributions to the global regulation of diurnal gene expression in Arabidopsis. *Plant Cell* **17**, 3257–3281 (2005).
65. Coruzzi, G. M. Primary N-assimilation into Amino Acids in Arabidopsis. *Arab. B.* **2**, e0010 (2003).
66. Wong, H. K., Chan, H. K., Coruzzi, G. M. & Lam, H. M. Correlation of ASN2 Gene Expression with Ammonium Metabolism in Arabidopsis. *Plant Physiol.* **134**, 332–338 (2004).
67. Curran, A. *et al.* Calcium-Dependent Protein Kinases from Arabidopsis Show Substrate Specificity Differences in an Analysis of 103 Substrates. *Front. Plant Sci.* **2**, 1–15 (2011).
68. Kline, K. G., Barrett-Wilt, G. a & Sussman, M. R. In planta changes in protein phosphorylation induced by the plant hormone abscisic acid. *Proc. Natl. Acad. Sci. U. S. A.* **107**, 15986–15991 (2010).
69. Pou, A. *et al.* Salinity-mediated transcriptional and post-translational regulation of the Arabidopsis aquaporin PIP2;7. *Plant Mol. Biol.* **92**, 731–744 (2016).
70. Prado, K. *et al.* Oscillating aquaporin phosphorylation and 14-3-3 proteins mediate the circadian regulation of leaf hydraulics. *Plant Cell* **31**, 417–429 (2019).
71. Chen, L.-Q. *et al.* Sucrose Efflux Mediated by SWEET Proteins as a Key Step for Phloem Transport. *Science (80-. ).* **335**, 207–211 (2012).
72. Deyholos, M. K. *et al.* Varicose, a WD-domain protein, is required for leaf blade. *Development* **130**, 6577–6588 (2003).
73. Kawa, D. *et al.* SnRK2 protein kinases and mRNA decapping machinery control root

- development and response to salt. *Plant Physiol.* **182**, 361–371 (2020).
74. Nielsen, T. H., Rung, J. H. & Villadsen, D. Fructose-2,6-bisphosphate: a traffic signal in plant metabolism. *Trends Plant Sci.* **9**, 556–63 (2004).
  75. McCormick, A. J. & Kruger, N. J. Lack of fructose 2,6-bisphosphate compromises photosynthesis and growth in Arabidopsis in fluctuating environments. *Plant J.* **81**, 670–683 (2015).
  76. Villadsen, D., Rung, J. H., Draborg, H. & Nielsen, T. H. Structure and heterologous expression of a gene encoding fructose-6-phosphate,2-kinase/fructose-2,6-bisphosphatase from Arabidopsis thaliana. *Biochim. Biophys. Acta* **1492**, 406–413 (2000).
  77. Kulma, A. *et al.* Phosphorylation and 14-3-3 binding of Arabidopsis 6-phosphofructo-2-kinase/fructose-2,6-bisphosphatase. *Plant J.* **37**, 654–667 (2004).
  78. Bläsing, O. E. *et al.* Sugars and Circadian Regulation Make Major Contributions to the Global Regulation of Diurnal Gene Expression in Arabidopsis. *Plant Cell* **17**, 3257–3281 (2005).
  79. Sugano, S., Andronis, C., Ong, M. S., Green, R. M. & Tobin, E. M. The protein kinase CK2 is involved in regulation of circadian rhythms in Arabidopsis. *Proc. Natl. Acad. Sci. U. S. A.* **96**, 12362–6 (1999).
  80. Akashi, M. & Nishida, E. Involvement of the MAP kinase cascade in resetting of the mammalian circadian clock. *Genes Dev.* **14**, 645–649 (2000).
  81. Iitaka, C., Miyazaki, K., Akaike, T. & Ishida, N. A role for glycogen synthase kinase-3beta in the mammalian circadian clock. *J. Biol. Chem.* **280**, 29397–29402 (2005).
  82. Besing, R. C. *et al.* Circadian Rhythmicity of Active GSK3 Isoforms Modulates Molecular Clock Gene Rhythms in the Suprachiasmatic Nucleus. *J. Biol. Rhythms* **XX**, 1–6 (2015).
  83. Martinek, S., Inonog, S., Manoukian, A. S. & Young, M. W. A role for the segment polarity gene shaggy/GSK-3 in the Drosophila circadian clock. *Cell* **105**, 769–779 (2001).
  84. Nietzsche, M., Schießl, I. & Börnke, F. The complex becomes more complex: protein-protein interactions of SnRK1 with DUF581 family proteins provide a framework for cell- and stimulus type-specific SnRK1 signaling in plants. *Front. Plant Sci.* **5**, 54 (2014).
  85. Shin, J. *et al.* The metabolic sensor AKIN10 modulates the Arabidopsis circadian clock in a light-dependent manner. *Plant. Cell Environ.* (2017). doi:10.1111/pce.12903
  86. Sánchez-Villarreal, A., Davis, A. M. & Davis, S. J. AKIN10 activity as a cellular link between metabolism and circadian-clock entrainment in Arabidopsis thaliana. *Plant Signal. Behav.* **13**, e1411448 (2018).
  87. Frank, A. *et al.* Circadian Entrainment in Arabidopsis by the Sugar-Responsive Transcription Factor bZIP63. *Curr. Biol.* **28**, 2597-2606.e6 (2018).
  88. González, A., Hall, M. N., Lin, S. C. & Hardie, D. G. AMPK and TOR: The Yin and Yang of

Cellular Nutrient Sensing and Growth Control. *Cell Metab.* **31**, 472–492 (2020).

### Footnotes

This work was supported by the Wellcome Trust [096995/Z/11/Z] and BBSRC, and EPSRC awards [BB/D019621] and [BB/J009423].



## Figure legends

Figure 1: Experiment workflow and comparison of protein and phosphopeptide numbers with published transcriptome time courses. A) WT and CCA1-OX plants were grown in 12h light:12h dark cycles for 22 days and then subjected to continuous light. In dataset I, rosettes were harvested every 4h from ZT12, in dataset II from ZT24 until ZT48 (black arrows) with an additional WT time point at ZT52 (grey arrow). B) Sample processing and data analysis workflow: Plants were crushed and protein was extracted, precipitated and digested in-solution. Peptides were split into 10µg for global protein analysis (of which 4µg were injected) and 490µg for phosphopeptide enrichment on TiO<sub>2</sub> spin tips. Peptides were analysed by LC-MS/MS. Outliers were removed before further bioinformatics analysis. C) Venn diagrams showing overlap of quantified (C,E) and rhythmic (WT only; D,F) transcripts (Covington et al. 2008), proteins and phosphoproteins in dataset I (C,D) and dataset II (E,F).

Figure 2: Examples of three proteins with rhythmic abundance in both datasets. (A) MIPS1, (B) BAM3, (C) LHCB2.2. JTK\_CYCLE p-values are indicated under the graphs.

Figure 3: Examples of newly described phosphopeptide rhythms with JTK\_CYCLE  $p < 0.05$  in both datasets. Phosphopeptide from (A) an asparagine synthetase, ASN2, with global protein abundance plots (B) from aquaporin PIP2;7 with global protein abundance plot from dataset I (not detected in dataset II) (C) from the sucrose efflux protein SWEET12 and (D) from VCR. Protein not detected in global proteomics for (C) and (D). JTK\_CYCLE p-values are indicated under the graphs.

Figure 4: Whole-dataset protein and phosphopeptide dynamics. Heatmaps were generated by hierarchical clustering of phosphopeptide (A, B) or global protein (C, D) abundance time courses in dataset I and II (indicated on the right) for WT (A,C) and CCA1-OX (B,D).

Figure 5: Peak time and period distribution of phosphopeptide and global protein time courses. (A-D): Number of rhythmic (JTK\_CYCLE p-value <0.05) phosphopeptides (A,B) or proteins (C,D) peaking at each time point, allowing a period of around 24h (22 to 26) or 12 to 20h. (E-F) Periods according to JTK\_CYCLE allowing periods from 12 to 24h for phosphoproteomics dataset I (E) and II (F). Number of rhythmic phosphopeptides (JTK\_CYCLE p-value < 0.05) for each predicted period is plotted.

Figure 6: *In vitro* GST-F2KP activity assay with WT and Ser276 point mutations. A) fructose-2,6-bisphosphate (F26BP) accumulation during the reaction. B) Kinase activity calculated from slopes in (A). C) relative quantification of GST-F2KP in eluates probed with rabbit (Rb) anti F2KP and mouse (Ms) anti GST. Protein blot is shown below quantification for rabbit anti F2KP. A dilution series of a sample mix was used for quantification, ranging from 0.5 to 1.5 loading equivalent of the samples. Averages of both dilution curves were used. Error bars: SEM. \* p-value < 0.05 in t-test.

## Tables

Table 1: Identification counts for global and phosphoproteomics datasets. A) Numbers of quantified and changing identifications in each dataset, B) shared and added numbers of both datasets. In B) protein IDs of peptides are used for simplicity of comparison.

**A**

|                                                       | Dataset I         |         |                        |                     | Dataset II        |         |                        |                     |
|-------------------------------------------------------|-------------------|---------|------------------------|---------------------|-------------------|---------|------------------------|---------------------|
|                                                       | Global Proteomics |         | Phosphoproteomics      |                     | Global Proteomics |         | Phosphoproteomics      |                     |
|                                                       | WT                | CCA1-OX | WT                     | CCA1-OX             | WT                | CCA1-OX | WT                     | CCA1-OX             |
| Quantifiable identifications before merging           | 1896 proteins     |         | 2287 phosphopeptides   |                     | 1340 proteins     |         | 1664 phosphopeptides   |                     |
| Quantifiable identifications after merging            |                   |         | 1498 from 944 proteins |                     |                   |         | 1132 from 747 proteins |                     |
| Significantly changing (ANOVA $p < 0.05$ )            | 245               | 147     | 406                    | 296                 | 68                | 46      | 88                     | 83                  |
| Adjusted for multiple testing (ANOVA $q < 0.05$ )     | 13                | 3       | 56                     | 4                   | 3                 | 2       | 14                     | 7                   |
| Rhythmic by JTK_CYCLE ( $p < 0.05$ )                  | 171               | 122     | 606 from 481 proteins  | 37 from 32 proteins | 45                | 57      | 100 from 91 proteins   | 17 from 17 proteins |
| Adjusted for multiple testing (JTK:CYCLE $q < 0.05$ ) | 6                 | 0       | 338                    | 2                   | 6                 | 0       | 26                     | 0                   |
| JTK_CYCLE $p < 0.05$ in both genotypes                | 17                |         | 22                     |                     | 9                 |         | 3                      |                     |

  

**B**

|                                                      | Global Proteomics |         | Phosphoproteomics |         |
|------------------------------------------------------|-------------------|---------|-------------------|---------|
|                                                      | WT                | CCA1-OX | WT                | CCA1-OX |
| JTK $p < 0.05$ detected in both datasets             | 6                 | 3       | 48                | 2       |
| all quantified protein IDs detected in both datasets | 137               |         | 626               |         |
| sum of all quantifiable protein IDs in both datasets | 2501              |         | 1065              |         |

Table 2: List of all proteins and phosphopeptides that are rhythmic in WT or CCA1-OX in both datasets (i.e. shared rhythmic IDs). All p-values are based on JTK\_CYCLE analysis. \* in some phosphopeptides, the location of phosphorylated residues differs slightly (either shifted by 1-2 residues or one of several phosphates is missing) between datasets, in which case the phosphorylated residues of both datasets are noted (dataset I / dataset II). Bold: phase difference of peak is up to 4h. fam. = family, pr. = protein

A) Phosphopeptides, WT

| Accession | Description                                  | Peptide ID dataset I | Peptide ID dataset II | Peptide sequence                                   | Phospho residue(s) | p-value dataset I | p-value dataset II | q-value dataset I | q-value dataset II | Peak dataset I (h) | Peak dataset II (h) |
|-----------|----------------------------------------------|----------------------|-----------------------|----------------------------------------------------|--------------------|-------------------|--------------------|-------------------|--------------------|--------------------|---------------------|
| AT4G32340 | TPR-like superfam. pr.                       | 15668                | 12823                 | SASSLDLNLRL                                        | 3                  | 9.5E-05           | 1.9E-09            | 5.7E-03           | 2.1E-06            | 12                 | 32                  |
| AT2G33830 | Dormancy/auxin associated fam. pr.           | 6246                 | 2709                  | TVAAVAGSPGTPTTPGSAR                                | 13 / 11            | 2.0E-02           | 2.0E-08            | 6.5E-02           | 8.9E-06            | 12                 | 40                  |
| AT4G31700 | RPS6A                                        | 8624                 | 778                   | SRLSSAAAKPSVTA                                     | 1,4,5/1,4,11       | 2.0E-06           | 2.4E-08            | 4.9E-04           | 8.9E-06            | 24                 | 24                  |
| AT3G47470 | CAB4                                         | 715                  | 636                   | DLSFTSIGSSAK                                       | 3                  | 1.3E-06           | 1.6E-07            | 4.9E-04           | 3.0E-05            | 28                 | 32                  |
| AT3G07650 | COL9                                         | 8182                 | 11184                 | AGEAYDYDPLTPTRSY                                   | 15                 | 3.0E-03           | 2.4E-07            | 2.7E-02           | 3.8E-05            | 24                 | 40                  |
| AT4G31700 | RPS6A                                        | 8624                 | 1785                  | SRLSSAAAKPSVTA                                     | 1, 4, 5            | 2.0E-06           | 2.8E-07            | 4.9E-04           | 3.9E-05            | 24                 | 24                  |
| AT5G10360 | RPS6B                                        | 41, 1736             | 28                    | SRLSSAPAKPVAA                                      | 4 / 1, 4           | 7.4E-03           | 4.8E-07            | 4.0E-02           | 5.9E-05            | 32                 | 24                  |
| AT4G31700 | RPS6A                                        | 8624                 | 21                    | SRLSSAAAKPSVTA                                     | 1, 4, 5 / 1, 4     | 2.0E-06           | 9.5E-07            | 4.9E-04           | 1.1E-04            | 24                 | 24                  |
| AT5G48250 | B-box type zinc finger                       | 11033                | 16261                 | SGEAYDYDPMSPTRSY                                   | 15 / 16            | 7.4E-03           | 1.6E-06            | 4.0E-02           | 1.6E-04            | 24                 | 40                  |
| AT1G69870 | NRT1.7                                       | 7142                 | 8476                  | ISSPGSILDAEK                                       | 3                  | 1.7E-04           | 3.0E-06            | 6.8E-03           | 2.8E-04            | 24                 | 48                  |
| AT5G40890 | CLC-A                                        | 1783                 | 1852                  | HRTLSSTPLALVVGAK                                   | 3, 5               | 5.1E-05           | 1.1E-04            | 4.0E-03           | 7.3E-03            | 24                 | 24                  |
| AT5G53420 | CCT motif family pr.                         | 1950                 | 1997                  | LGAGLVQSPDR                                        | 8                  | 6.0E-03           | 1.1E-04            | 3.6E-02           | 7.3E-03            | 28                 | 48                  |
| AT5G20670 | DUF1677                                      | 4202                 | 5127                  | TSSSAGLPGIDGVESR                                   | 3 / 4              | 1.9E-03           | 1.6E-04            | 2.3E-02           | 1.0E-02            | 28                 | 48                  |
| AT1G73980 | Phosphoribulokinase / Uridine kinase fam.    | 10001                | 8639                  | LSLDDDTVSSPK                                       | 10                 | 1.7E-02           | 1.9E-04            | 5.9E-02           | 1.1E-02            | 28                 | 24                  |
| AT1G78020 | DUF581                                       | 10297, 1700          | 3249, 1093            | LLSMVTPR                                           | 3                  | 1.3E-05           | 2.1E-04            | 1.5E-03           | 1.2E-02            | 24                 | 24                  |
| AT1G78020 | DUF581                                       | 2081, 5542, 5542     | 2113, 737, 2081       | RHSGDFSDAGHFLR                                     | 3                  | 2.4E-02           | 1.5E-03            | 7.4E-02           | 6.2E-02            | 24                 | 24                  |
| AT1G11310 | MLO2                                         | 1496                 | 3909                  | SVENYPSSPSR                                        | 7 / 8, 10          | 2.3E-04           | 1.9E-03            | 7.7E-03           | 6.9E-02            | 32                 | 24                  |
| AT4G31700 | RPS6A                                        | 2489                 | 3985                  | LSSAAAKPSVTA                                       | 9                  | 1.5E-03           | 3.6E-03            | 2.1E-02           | 1.2E-01            | 32                 | 48                  |
| AT2G32240 | unknown                                      | 5883                 | 7383                  | DIDLSFSSPTKR                                       | 8                  | 1.1E-02           | 4.0E-03            | 4.9E-02           | 1.3E-01            | 24                 | 48                  |
| AT3G13290 | VCR                                          | 4140                 | 6826                  | TLSYPTPLNPQSPR                                     | 13                 | 3.0E-03           | 5.4E-03            | 2.7E-02           | 1.6E-01            | 28                 | 48                  |
| AT4G35100 | PIP3A                                        | 140                  | 214                   | ALGSFRSNATN                                        | 4, 7               | 1.1E-02           | 8.0E-03            | 4.9E-02           | 1.9E-01            | 28                 | 24                  |
| AT5G38640 | NagB/RpiA/CoA transferase-like superfam. pr. | 4683                 | 1690                  | DFPDGTTASPR                                        | 10                 | 6.0E-03           | 8.8E-03            | 3.6E-02           | 2.0E-01            | 32                 | 24                  |
| AT1G37130 | NIA2                                         | 4382                 | 2045, 2045            | VHDDDEDVSSSEDE<br>NETHNSNAVYYK                     | 9, 10              | 9.0E-04           | 8.8E-03            | 1.7E-02           | 2.0E-01            | 28                 | 28                  |
| AT3G13530 | MAPKKK7                                      | 3515                 | 6312                  | SKLPLVGVSSFR                                       | 10                 | 3.0E-03           | 8.8E-03            | 2.7E-02           | 2.0E-01            | 28                 | 40                  |
| AT1G35580 | CINVI                                        | 903                  | 1066                  | SVLDTPSSAR                                         | 5, 8               | 1.7E-02           | 9.7E-03            | 5.9E-02           | 2.1E-01            | 24                 | 24                  |
| AT1G74780 | Major Facilitator Superfam. pr.              | 6279                 | 4702, 5728            | TVPHDYSPLISSPK                                     | 12                 | 3.0E-03           | 9.7E-03            | 2.7E-02           | 2.1E-01            | 28                 | 48                  |
| AT3G27700 | zinc finger fam. pr.                         | 9563                 | 9073                  | LDTASDSGAAIASPK                                    | 13                 | 4.8E-03           | 1.1E-02            | 3.4E-02           | 2.2E-01            | 28                 | 48                  |
| AT5G65010 | ASN2                                         | 4975                 | 4842                  | AGSDLVDPLPK                                        | 3                  | 6.9E-04           | 1.3E-02            | 1.6E-02           | 2.4E-01            | 28                 | 24                  |
| AT4G31160 | DCAF1, DDB1-CUL4 associated factor 1         | 8754                 | 7154, 8583            | VHEGAPDTEVLL<br>ASPR                               | 14                 | 3.5E-02           | 1.3E-02            | 9.3E-02           | 2.4E-01            | 28                 | 48                  |
| AT4G13510 | AMT1;1                                       | 214                  | 110                   | SPSPSGANTTPTPV                                     | 1                  | 3.5E-02           | 1.4E-02            | 9.3E-02           | 2.5E-01            | 32                 | 48                  |
| AT5G23660 | SWEET12                                      | 14806                | 17187                 | LGTLTSPPEVAITVVR                                   | 6                  | 9.1E-03           | 1.8E-02            | 4.3E-02           | 3.0E-01            | 24                 | 40                  |
| AT3G26730 | RING/U-box superfam. pr.                     | 5794                 | 6017                  | NQTQSLPPDVSR                                       | 7                  | 1.3E-04           | 2.2E-02            | 6.2E-03           | 3.5E-01            | 24                 | 24                  |
| AT4G20910 | HEN1                                         | 15648                | 13859, 13859          | SSSPNVFAAPPILQK<br>YQSTYEGYGSPIREEP<br>PPPYSYSEPSR | 3 / 2, 3           | 9.5E-05           | 2.6E-02            | 5.7E-03           | 3.7E-01            | 28                 | 24                  |
| AT2G07360 | SH3 domain-containing pr.                    | 2769, 5085           | 9464, 8286            | TTSIGDGGEEGVDDK                                    | 10                 | 1.1E-02           | 2.6E-02            | 4.9E-02           | 3.7E-01            | 24                 | 36                  |
| AT4G26130 | unknown pr.                                  | 5416, 7652, 1518     | 7456                  | ASNFINK(FK)                                        | 3                  | 1.4E-02           | 2.6E-02            | 5.3E-02           | 3.7E-01            | 24                 | 40                  |
| AT1G44800 | nodulin MtN21                                | 7377                 | 34568                 | SQELPITNVVK                                        | 1                  | 4.4E-06           | 2.6E-02            | 6.5E-04           | 3.7E-01            | 28                 | 52                  |
| AT2G46920 | POL                                          | 7848                 | 11608                 | SNFSAPLSFR                                         | 8                  | 1.9E-03           | 3.1E-02            | 2.3E-02           | 4.1E-01            | 28                 | 40                  |
| AT2G42600 | PPC2                                         | 1672, 57             | 62, 40, 4070          | MASIDAQLR                                          | 3                  | 7.4E-03           | 4.0E-02            | 4.0E-02           | 4.7E-01            | 32                 | 24                  |
| AT3G60240 | EIF4G                                        | 1585                 | 1579                  | QVLQGPSATVNSPR                                     | 12                 | 3.8E-03           | 4.3E-02            | 3.0E-02           | 4.9E-01            | 28                 | 48                  |
| AT1G70770 | DUF2359                                      | 514                  | 169, 800              | MTAIDSDDDGVVR                                      | 6                  | 7.4E-03           | 4.3E-02            | 4.0E-02           | 4.9E-01            | 24                 | 48                  |
| AT5G40890 | CLC-A                                        | 749                  | 406                   | TLSSTPLALVVGAK                                     | 3                  | 1.3E-04           | 4.3E-02            | 6.2E-03           | 4.9E-01            | 28                 | 48                  |
| AT4G12770 | Chaperone DnaJ-domain superfam. pr.          | 238, 238             | 318                   | FENVFSSISSPTK                                      | 11                 | 6.0E-03           | 4.7E-02            | 3.6E-02           | 5.2E-01            | 28                 | 48                  |

Table 2 continued

### B) Phosphopeptides, CCA1-OX

| Accession | Description                                 | Peptide ID dataset I | Peptide ID dataset II | Peptide sequence    | Phospho residue(s) | p-value dataset I | p-value dataset II | q-value dataset I | q-value dataset II | Peak dataset I (h) | Peak dataset II (h) |
|-----------|---------------------------------------------|----------------------|-----------------------|---------------------|--------------------|-------------------|--------------------|-------------------|--------------------|--------------------|---------------------|
| AT2G33830 | Dormancy/auxin associated fam. pr.          | 1348, 43281          | 2709                  | TVAAVAGSPGTPPTPGSAR | 11                 | 0.023             | 0.0069             | 1                 | 1                  | 12                 | 24                  |
| AT1G51805 | Leucine-rich repeat protein kinase fam. pr. | 2617                 | 2514, 1136            | VEGTLPSYMQASDGRSPR  | 16                 | 0.019             | 0.021              | 1                 | 1                  | 24                 | 24                  |

### C) Phosphopeptides, CCA1-OX, allowing periods of 12 to 20h

| Accession | Description      | Peptide ID dataset I | Peptide ID dataset II | Peptide sequence | Phospho residue(s) | p-value dataset I | p-value dataset II | q-value dataset I | q-value dataset II | Peak dataset I (h) | Peak dataset II (h) |
|-----------|------------------|----------------------|-----------------------|------------------|--------------------|-------------------|--------------------|-------------------|--------------------|--------------------|---------------------|
| AT1G77760 | NIA1             | 4776                 | 1968                  | SVSSPFMNTASK     | 3                  | 0.013             | 0.00067            | 0.42              | 0.25               | 24                 | 48                  |
| AT2G45820 | Remorin fam. pr. | 1234, 5319           | 698, 2343             | ALAVVEKPIEEHTPK  | 13                 | 0.019             | 0.0045             | 0.42              | 0.68               | 24                 | 24                  |

### D) Global proteomics, WT

| Accession | Description     | p-value dataset I | p-value dataset II | q-value dataset I | q-value dataset II | Peak dataset I (h) | Peak dataset II (h) |
|-----------|-----------------|-------------------|--------------------|-------------------|--------------------|--------------------|---------------------|
| AT4G39800 | MI-1-P SYNTHASE | 6.22E-06          | 8.7E-12            | 0.00588435        | 5.78E-09           | 28                 | 24                  |
| AT4G17090 | BAM3            | 0.005602          | 4.6E-05            | 0.225379284       | 0.015428           | 20                 | 44                  |
| AT5G13630 | GUN5            | 0.030091          | 0.0001             | 0.427829153       | 0.027626           | 32                 | 52                  |
| AT1G78570 | RHM1            | 0.00045           | 0.00059            | 0.070946877       | 0.087173           | 28                 | 48                  |
| AT1G15820 | LHCB6           | 0.043966          | 0.02293            | 0.516391687       | 0.926734           | 12                 | 36                  |
| AT4G27440 | PORB            | 0.000255          | 0.0297             | 0.06492429        | 1                  | 12                 | 36                  |

### E) Global proteomics, CCA1-OX

| Accession | Description                | p-value dataset I | p-value dataset II | q-value dataset I | q-value dataset II | Peak dataset I (h) | Peak dataset II (h) |
|-----------|----------------------------|-------------------|--------------------|-------------------|--------------------|--------------------|---------------------|
| AT3G47070 | unknown                    | 0.034204          | 0.01201            | 0.634454201       | 0.909654           | 20                 | 40                  |
| AT3G49190 | O-acyltransferase fam. pr. | 0.001556          | 0.02209            | 0.24526271        | 0.916547           | 32                 | 44                  |
| AT4G39800 | MI-1-P SYNTHASE            | 0.000373          | 0.03406            | 0.175519785       | 0.98762            | 24                 | 24                  |

Table 3: Summary of GPS3 kinase prediction followed by Fisher's Exact test. Fisher's exact test p-values for enrichment of each kinase group are shown. a) dataset I, b) dataset II. Foreground groups were chosen with JTK\_CYCLE p-values <0.05 and peaks or troughs at indicated ZTs.

A) dataset I

| time point    | WT, 22 to 26h period |        |          |            | CCA1-OX, 22 to 26h period |         |            | CCA1-OX, 12 to 20h period |
|---------------|----------------------|--------|----------|------------|---------------------------|---------|------------|---------------------------|
|               | peak                 |        | trough   | all p<0.05 | peak                      | trough  | all p<0.05 | peak                      |
|               | 24h                  | 28h    | 12h      |            | 24h                       | 12h     |            | 24h                       |
| AGC           |                      |        |          |            | 0.043                     |         |            |                           |
| AGC/NDR       |                      | 0.0072 |          |            |                           |         |            |                           |
| Atypical/TAF1 | 6.50E-06             |        | 2.50E-06 |            |                           |         |            |                           |
| CAMK          |                      | 0.0012 |          | 0.0040     |                           | 0.00063 | 0.0090     | 0.024                     |
| CAMK/DAPK     |                      |        |          |            |                           |         |            | 0.029                     |
| CMGC/CK2      | 0.0012               |        | 4.70E-06 |            |                           |         |            |                           |
| CMGC/MAPK     |                      |        |          | 0.027      |                           |         |            |                           |
| Other / ULK   |                      |        | 0.040    |            |                           | 0.0030  | 0.0066     |                           |
| Other/WNK     |                      |        |          |            |                           |         |            | 0.044                     |

B) dataset II

| time point  | WT, 22 to 26h period |       |            | CCA1-OX, 22 to 26h period |            | CCA1-OX, 12 to 20h period |
|-------------|----------------------|-------|------------|---------------------------|------------|---------------------------|
|             | peak                 |       | all p<0.05 | peak                      | all p<0.05 | peak                      |
|             | 24h                  | 48h   |            | 24h                       |            | 24h                       |
| AGC         | 1.4E-06              |       |            |                           |            |                           |
| AGC/PDK1    | 0.0049               |       |            |                           |            |                           |
| CAMK        | 0.00024              |       | 0.0049     |                           |            | 0.048                     |
| CAMK-L      |                      |       |            |                           |            | 0.0035                    |
| CAMK-Unique | 0.057                |       |            |                           |            |                           |
| CMGC        | 0.0061               |       |            | 0.040                     |            |                           |
| CMGC/GSK    | 0.0078               |       |            |                           |            |                           |
| CMGC/MAPK   |                      | 0.040 |            |                           |            |                           |
| Other/PEK   |                      |       |            | 0.028                     | 0.047      |                           |
| STE/STE7    | 0.037                |       |            |                           |            |                           |

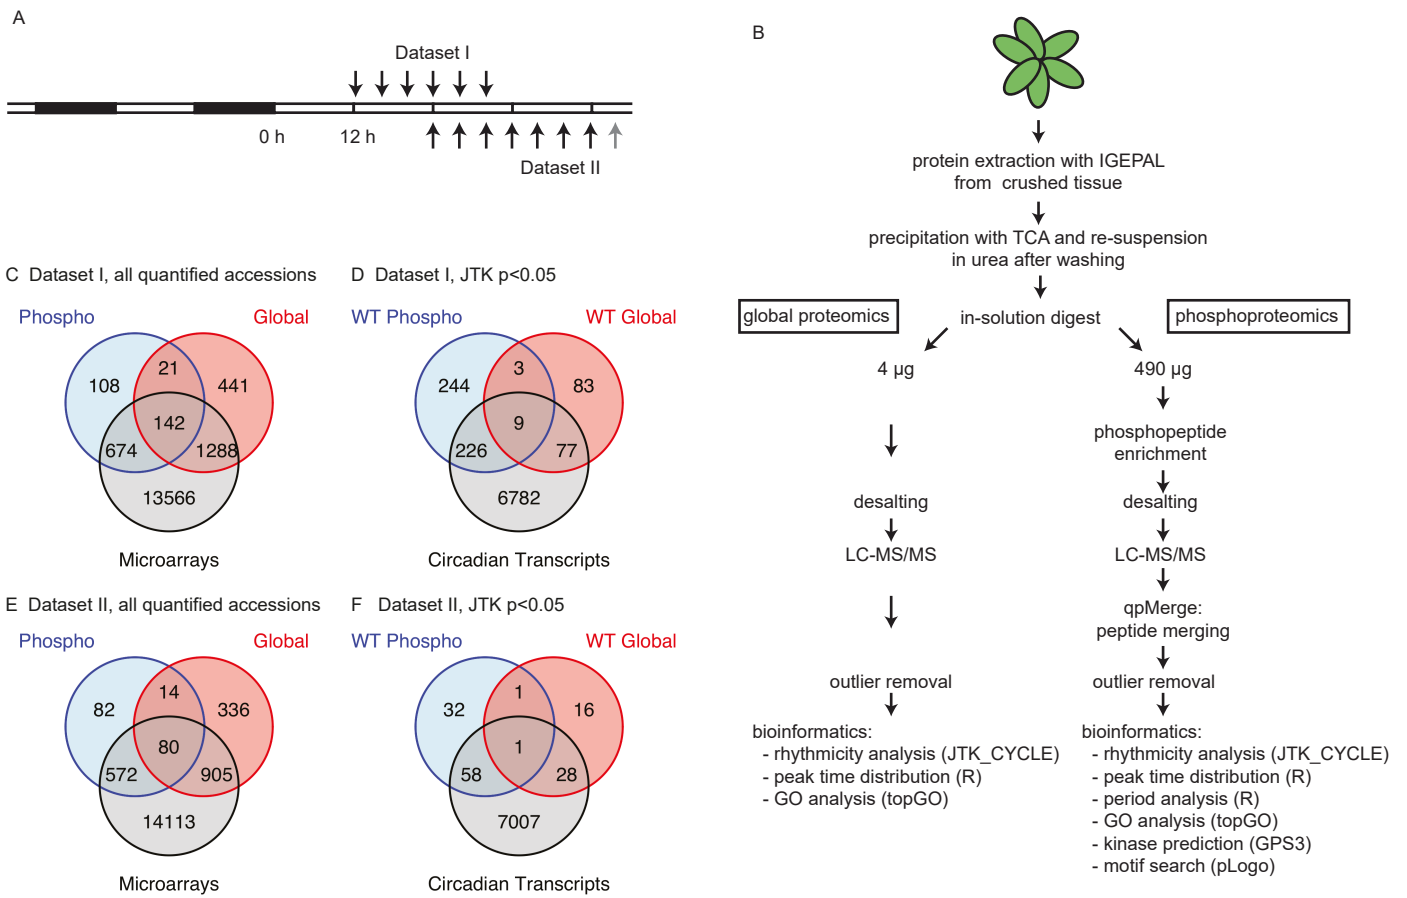

A AT4G39800, MI-1-P SYNTHASE

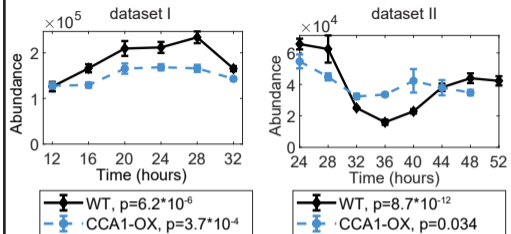

B AT4G17090, BETA-AMYLASE 3

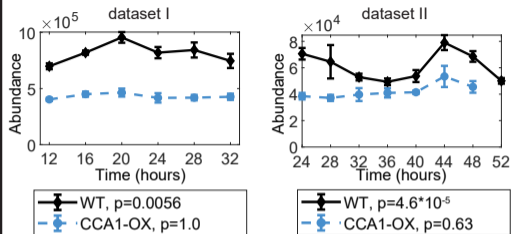

C AT2G05070, LHCB2.2

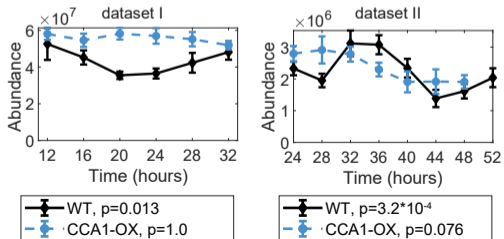



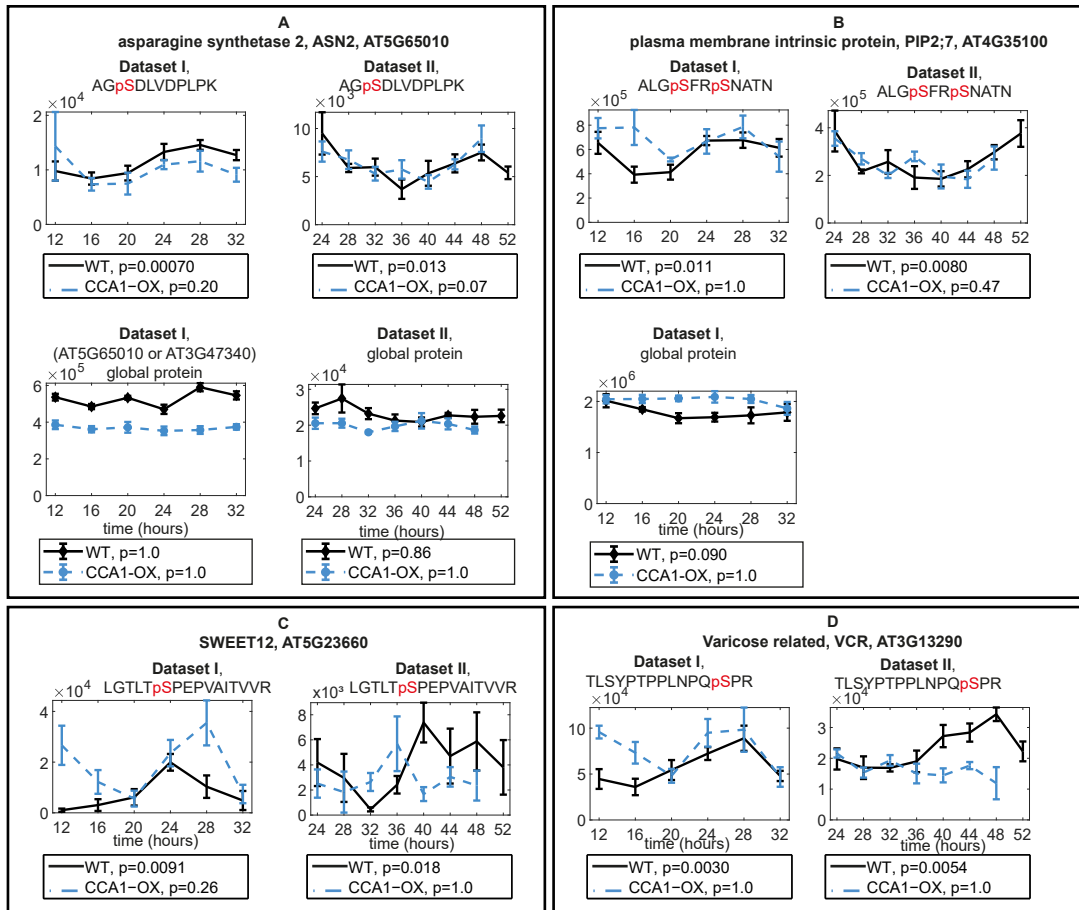

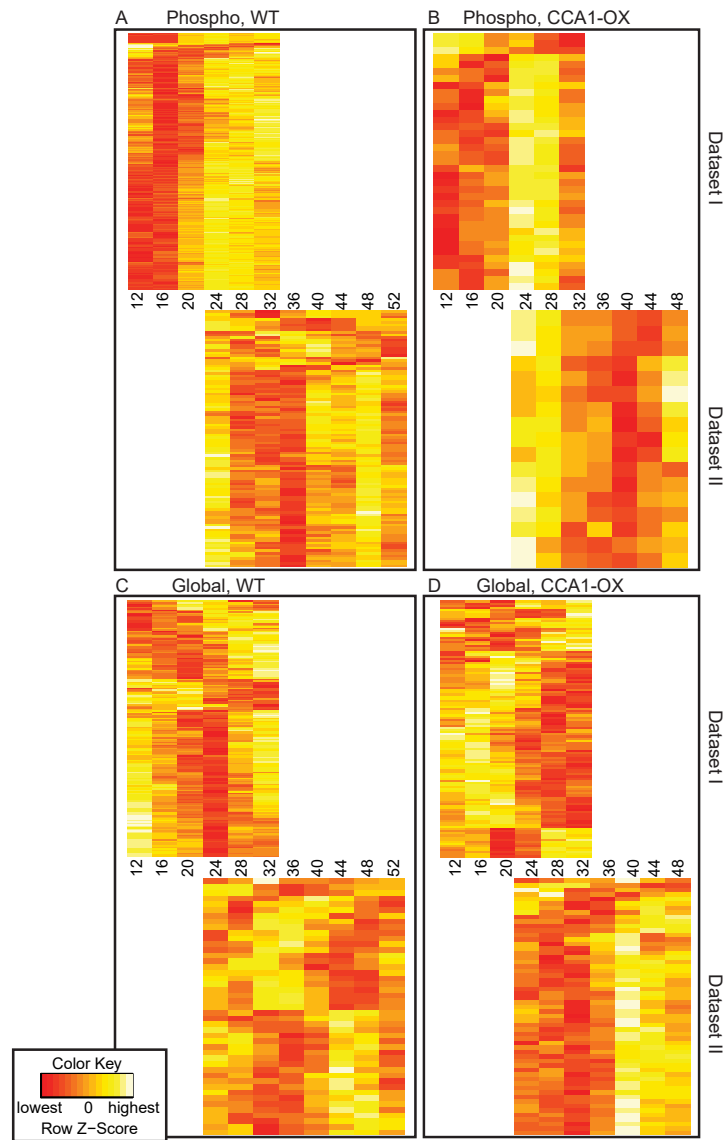

**A** Phosphoproteomics dataset I peak time distribution

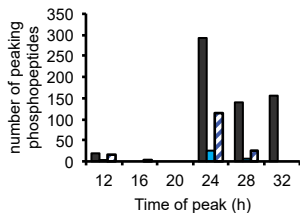

**B** Phosphoproteomics dataset II peak time distribution

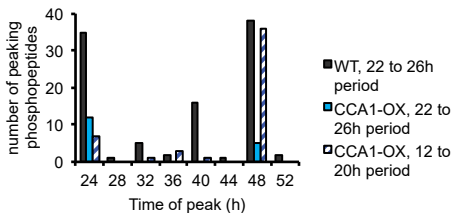

**C** Global proteomics dataset I peak time distribution

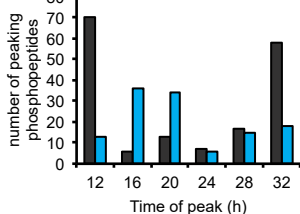

**D** Global proteomics dataset II peak time distribution

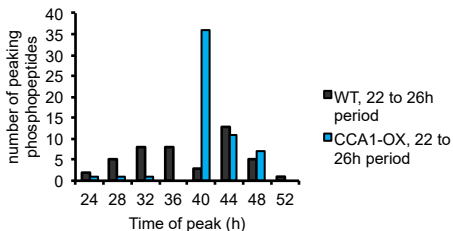

**E** Period distribution dataset I

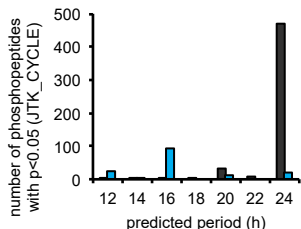

**F** Period distribution dataset II

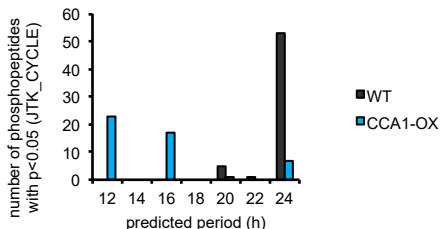

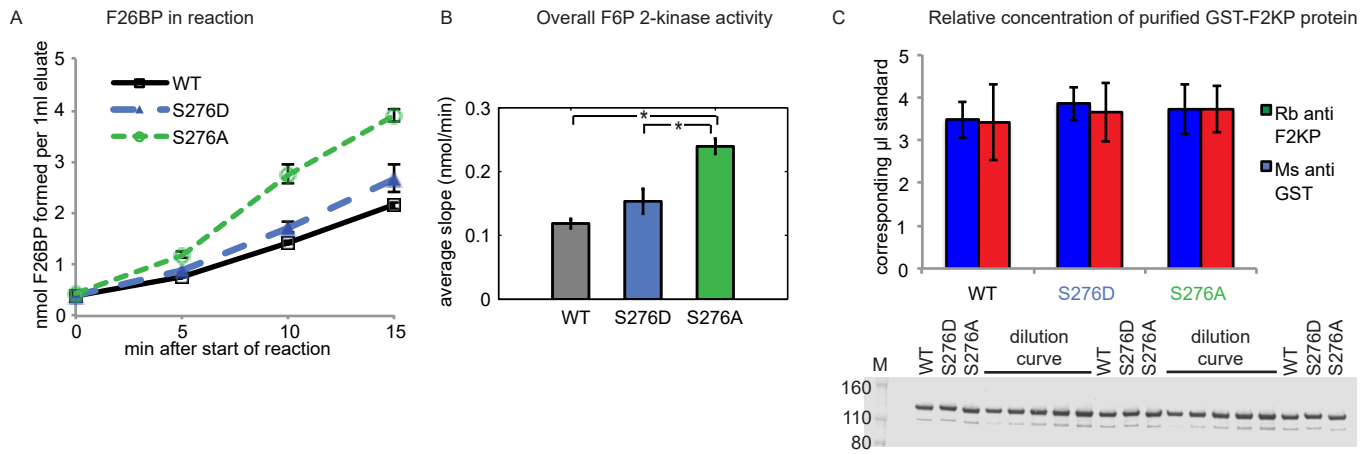

Source: https://www.biorxiv.org/content/biorxiv/early/2021/04/25/760892.full.pdf
